# Supplementary material
Source: PubMed Central journal article supplement (PMC6980235)

# W and Y estimates and errors - 2 day - PM2.5 Ammonium Ion

## True Values - NH4

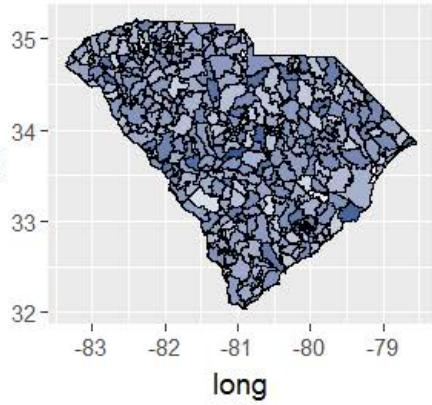

## W Estimates - NH4

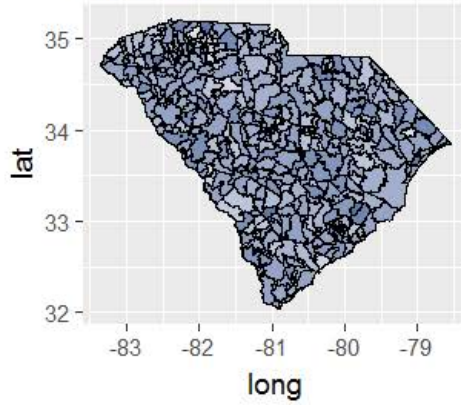

## W Estimate Errors - NH4

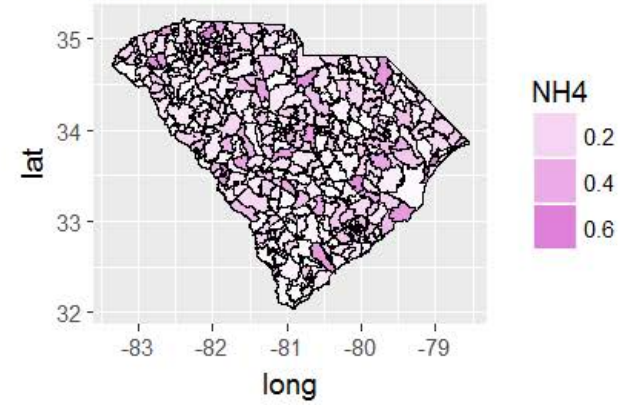

## Y Estimates - NH4

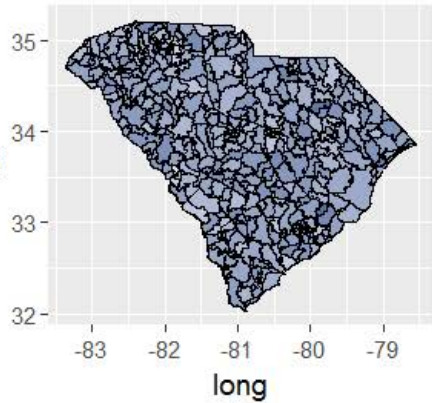

## Y Estimate Errors - NH4

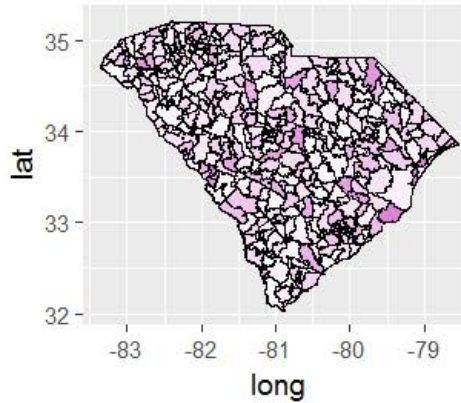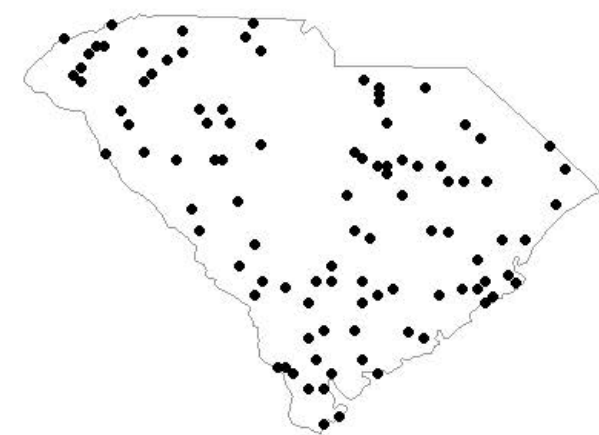

## True Values - NH4

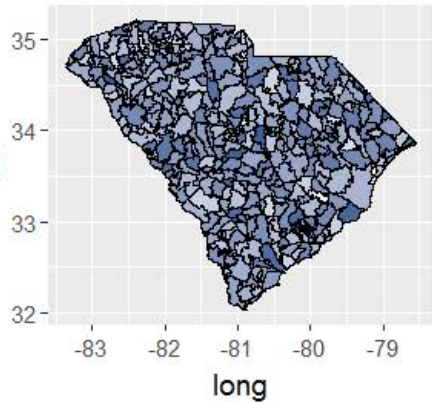

## W Estimates - NH4

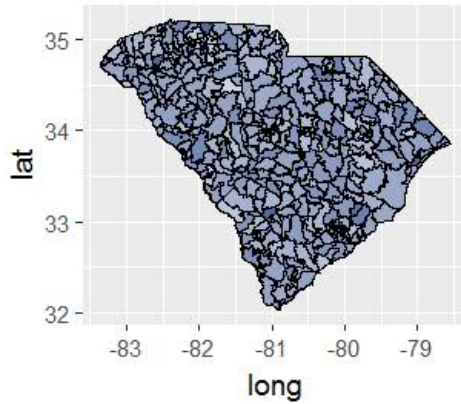

## W Estimate Errors - NH4

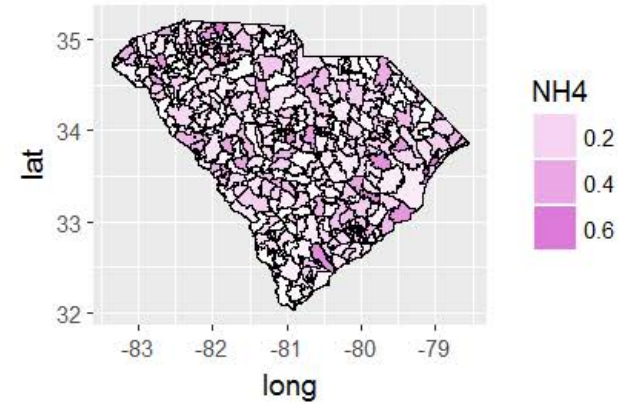

## Y Estimates - NH4

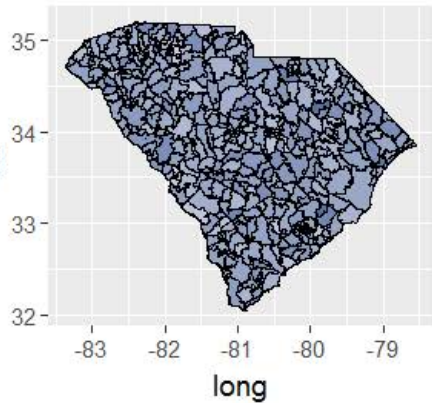

## Y Estimate Errors - NH4

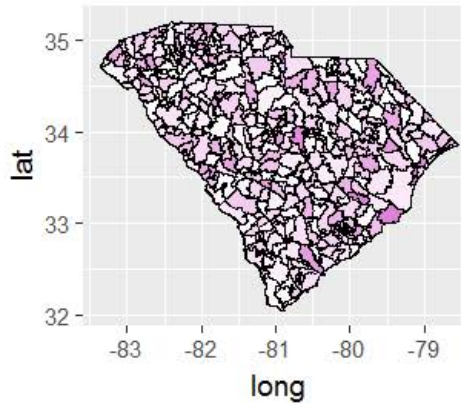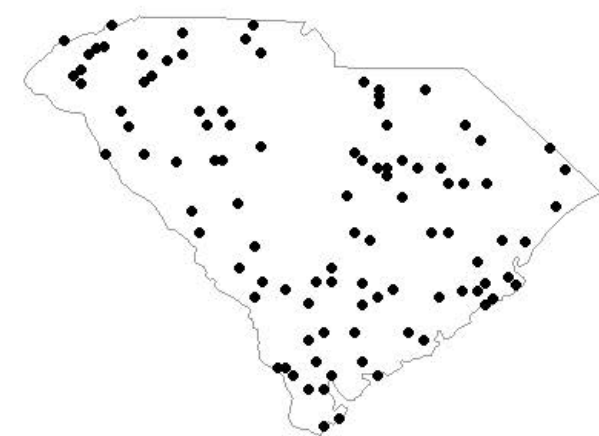



# W and Y estimates and errors - 2 day - PM2.5 EC

## True Values - EC1

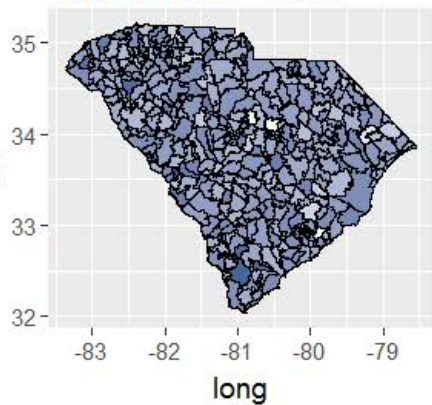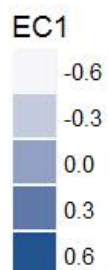

## W Estimates - EC1

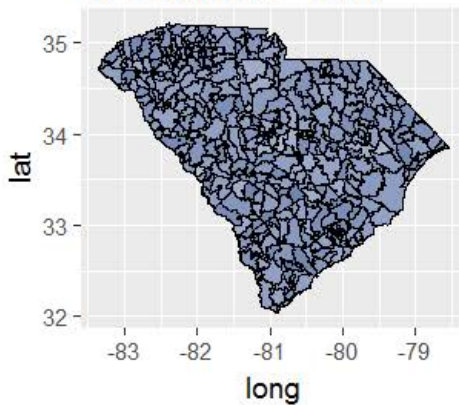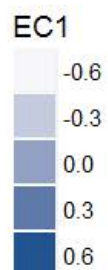

## W Estimate Errors - EC1

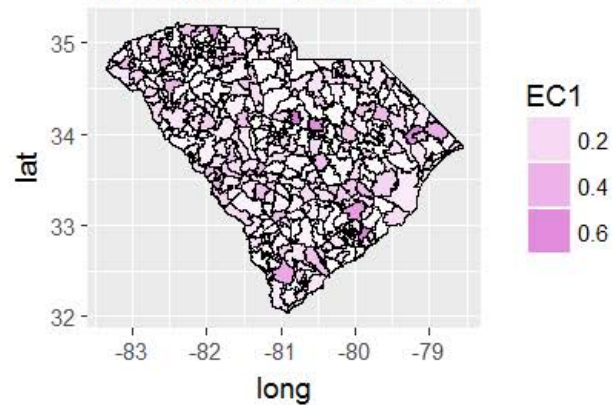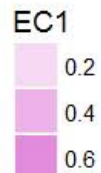

## Y Estimates - EC1

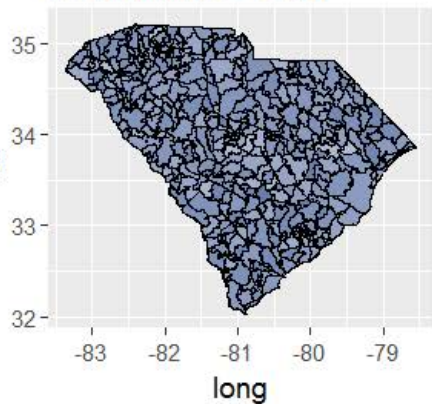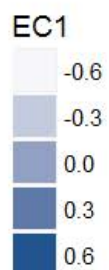

## Y Estimate Errors - EC1

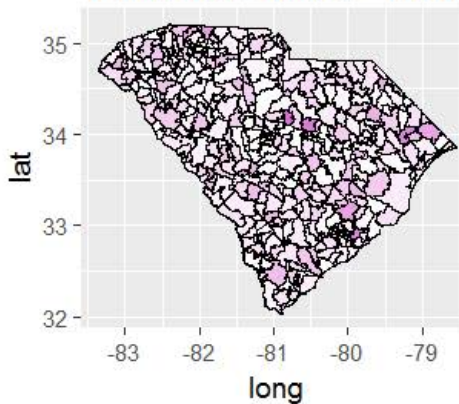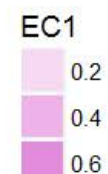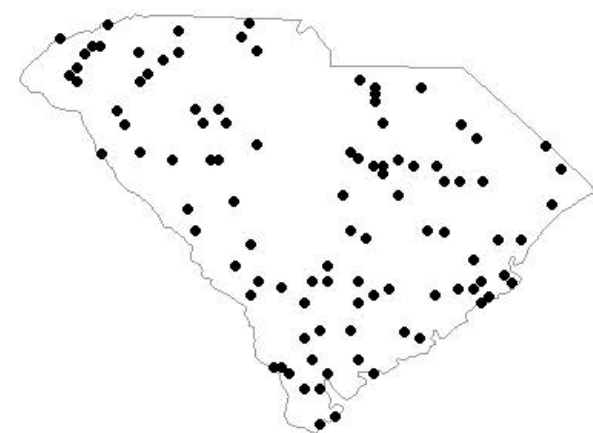

## True Values - EC1

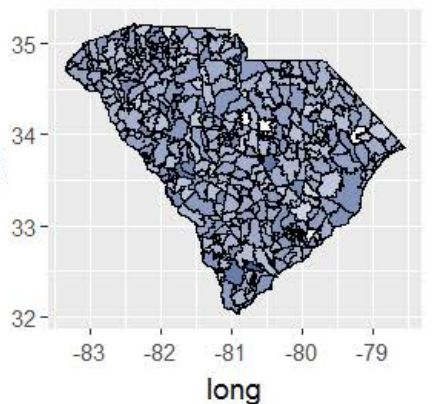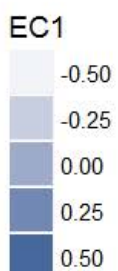

## W Estimates - EC1

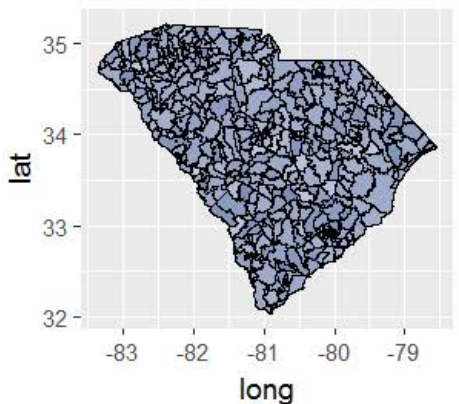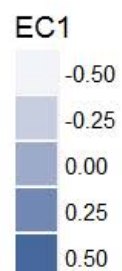

## W Estimate Errors - EC1

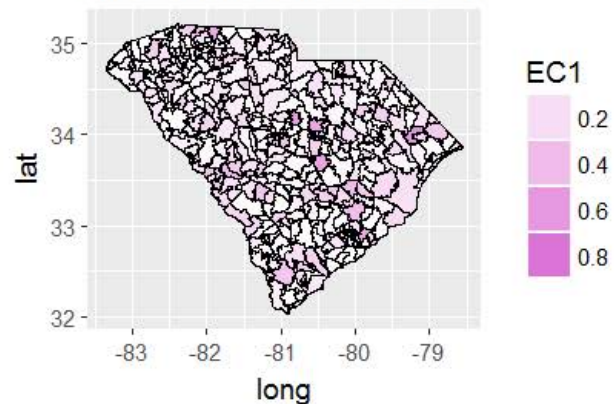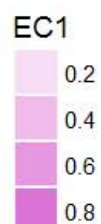

## Y Estimates - EC1

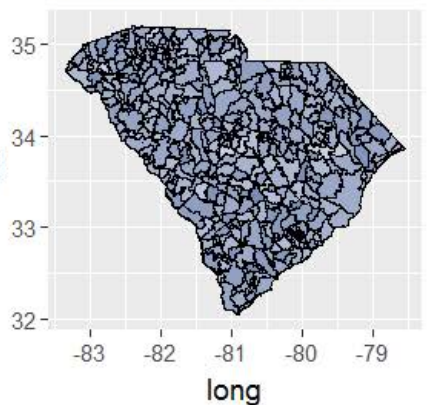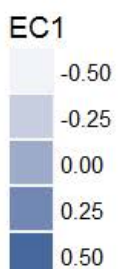

## Y Estimate Errors - EC1

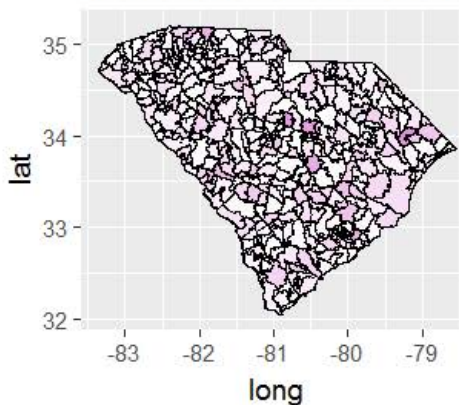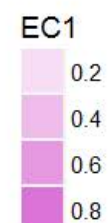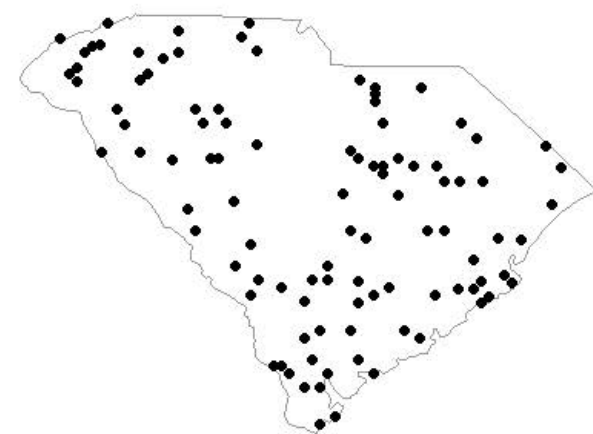



# W and Y estimates and errors - 2 day - PM2.5 Sulfate

## True Values - SO4

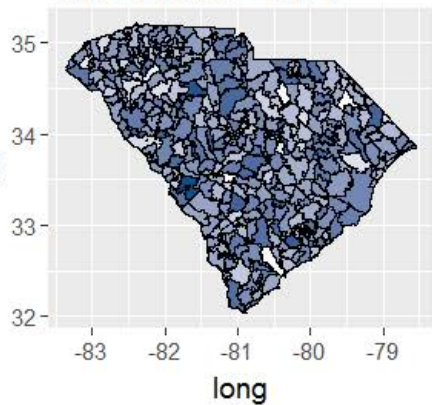

## W Estimates - SO4

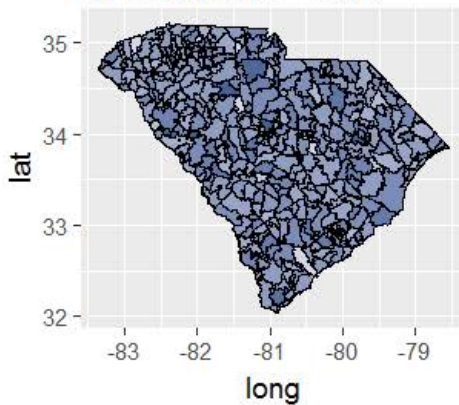

## W Estimate Errors - SO4

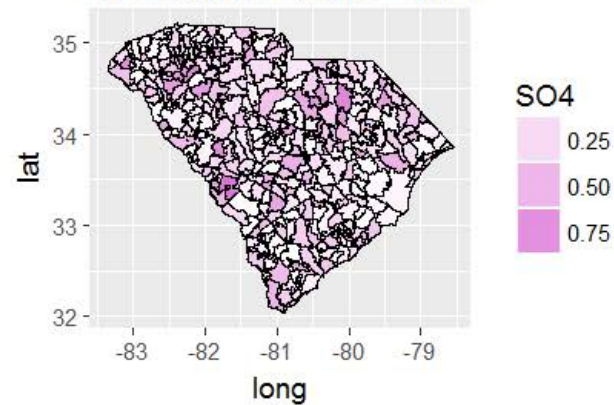

## Y Estimates - SO4

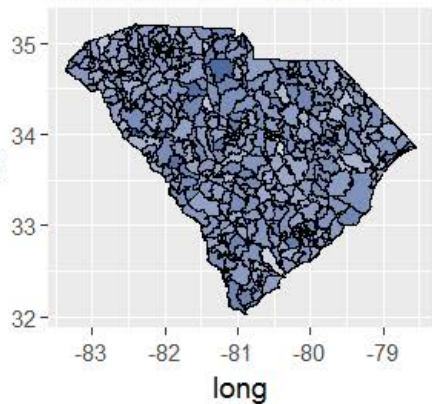

## Y Estimate Errors - SO4

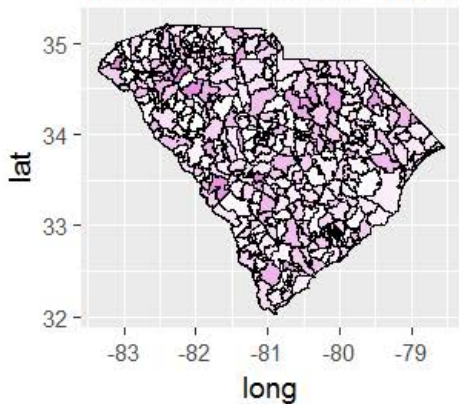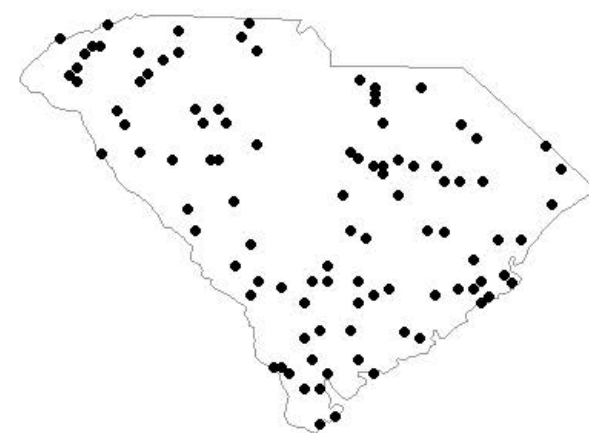

## True Values - SO4

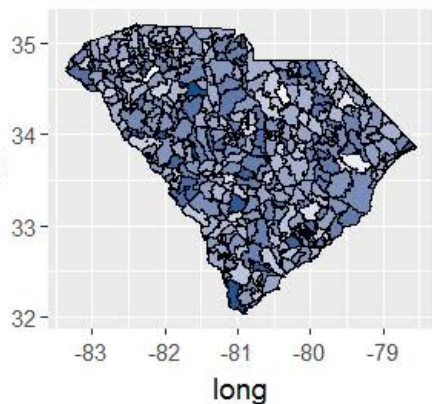

## W Estimates - SO4

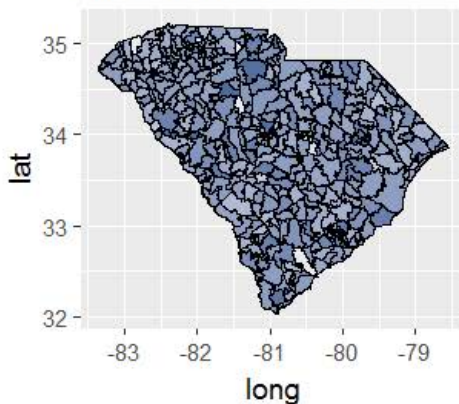

## W Estimate Errors - SO4

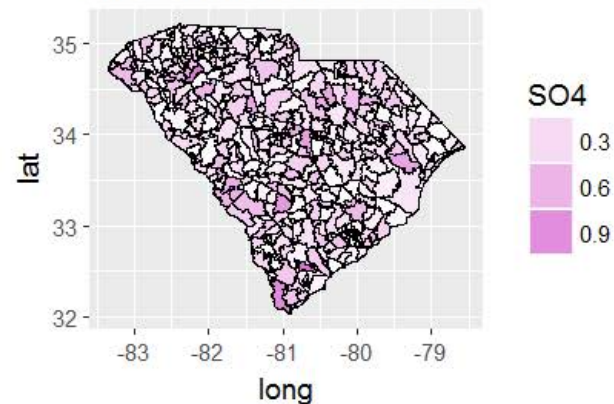

## Y Estimates - SO4

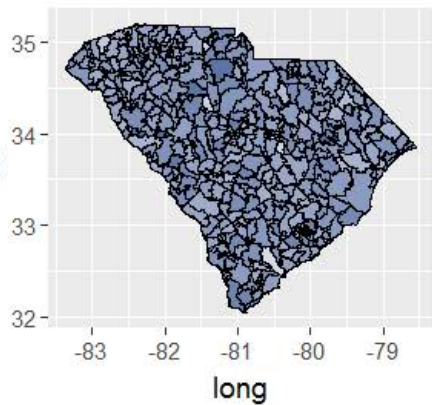

## Y Estimate Errors - SO4

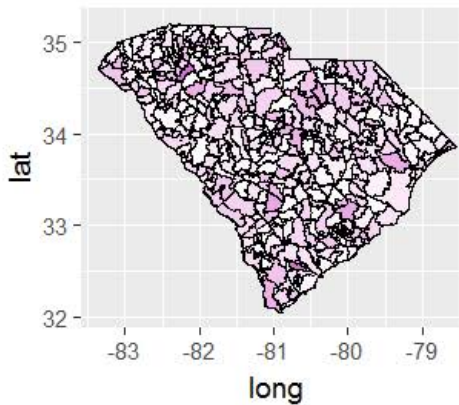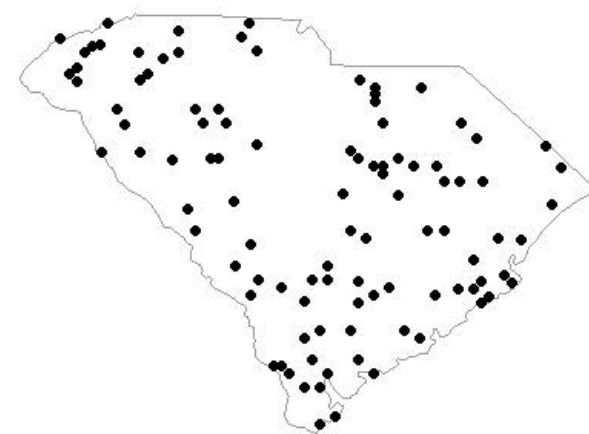



# W and Y estimates and errors - 2 day - Sulfur Dioxide

## True Values - SO2

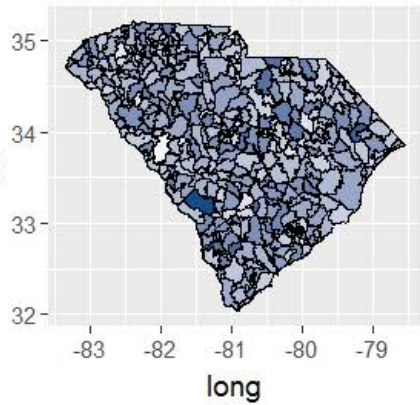

## W Estimates - SO2

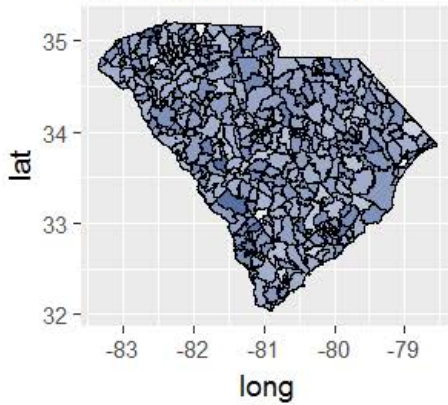

## W Estimate Errors - SO2

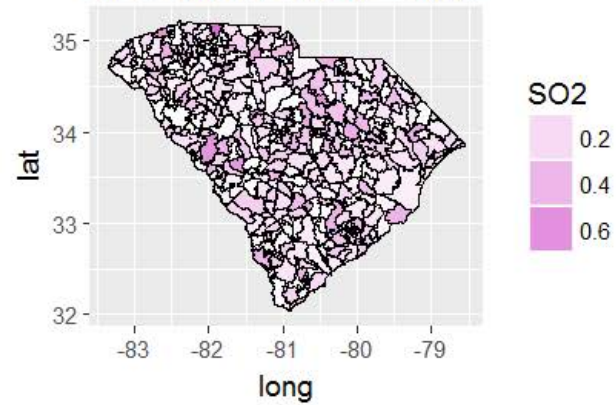

## Y Estimates - SO2

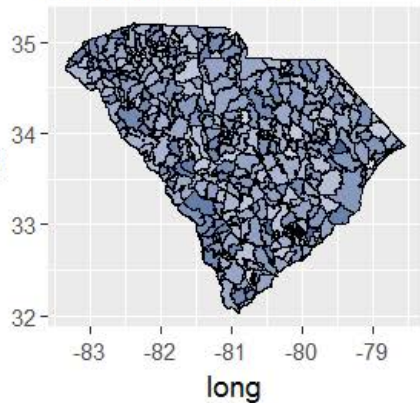

## Y Estimate Errors - SO2

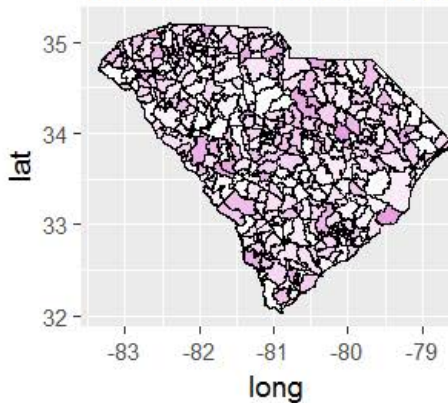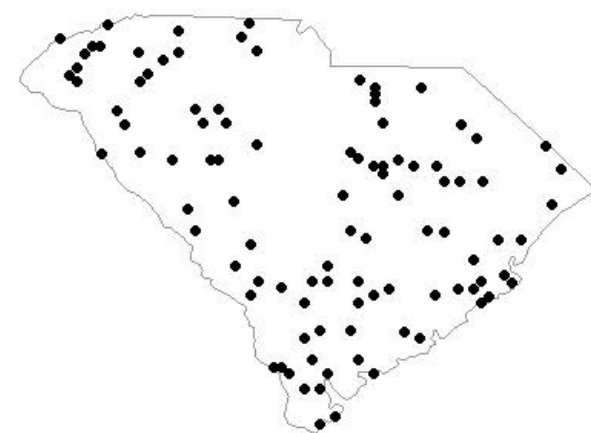

## True Values - SO2

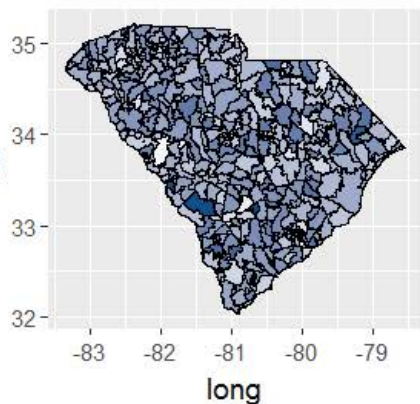

## W Estimates - SO2

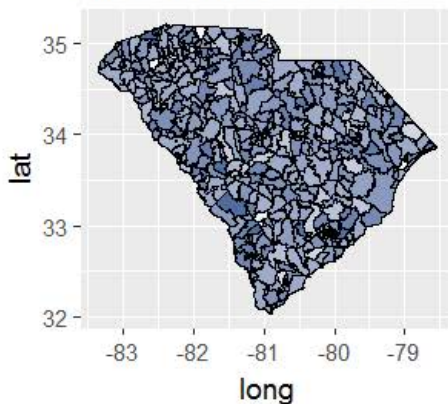

## W Estimate Errors - SO2

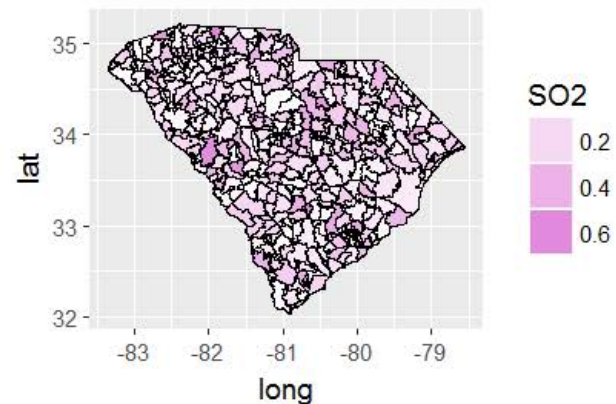

## Y Estimates - SO2

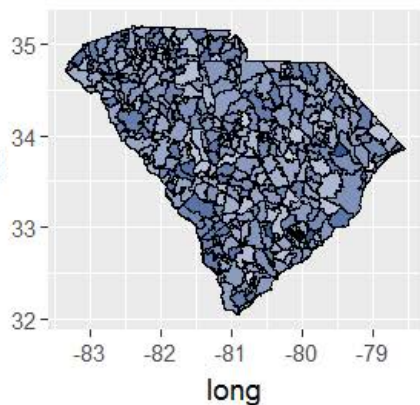

## Y Estimate Errors - SO2

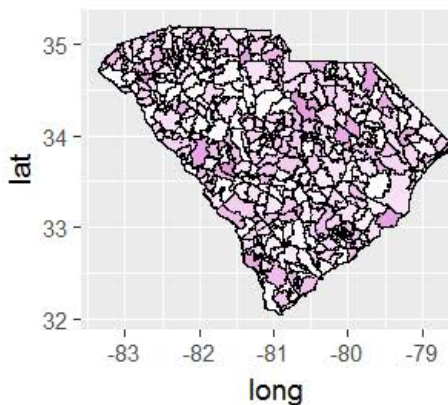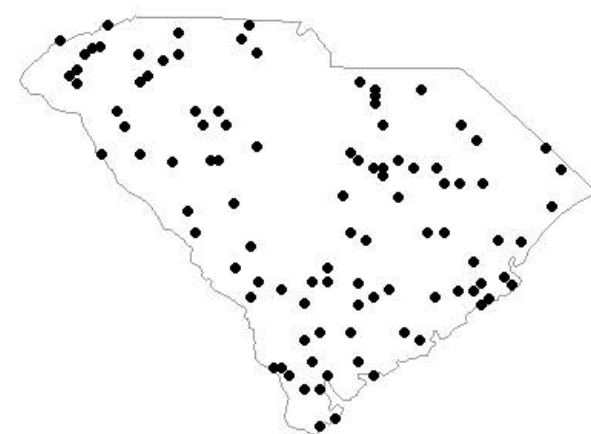



# W and Y estimates and errors - 2 day - Carbon Monoxide

## True Values - CO

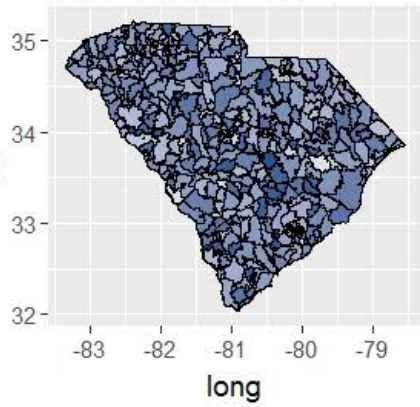

## W Estimates - CO

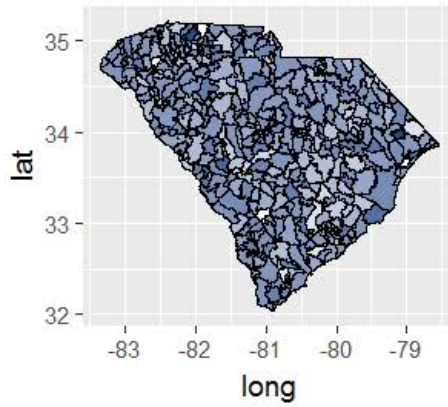

## W Estimate Errors - CO

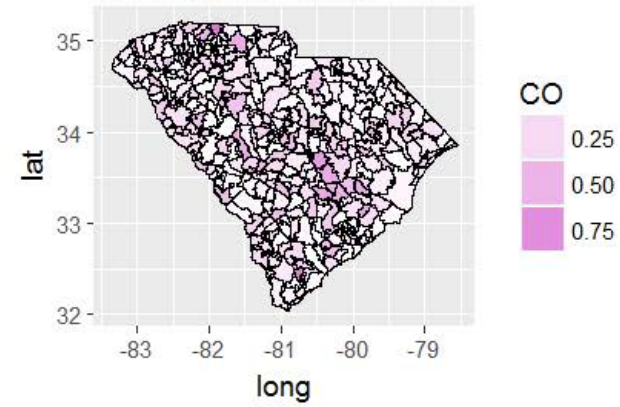

## Y Estimates - CO

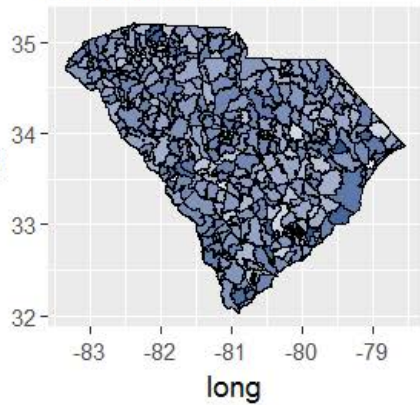

## Y Estimate Errors - CO

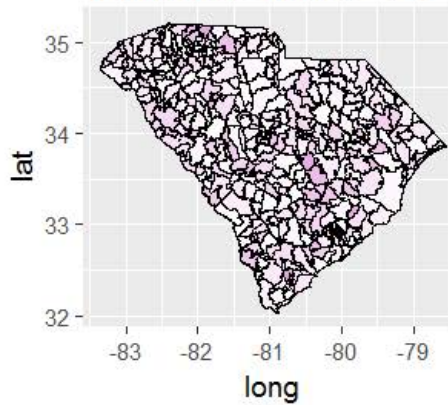

## True Values - CO

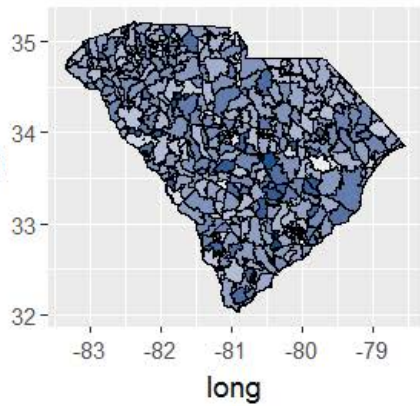

## W Estimates - CO

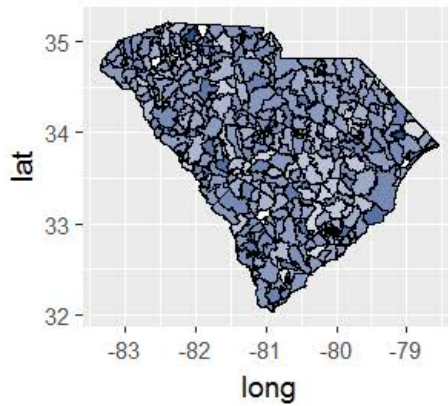

## W Estimate Errors - CO

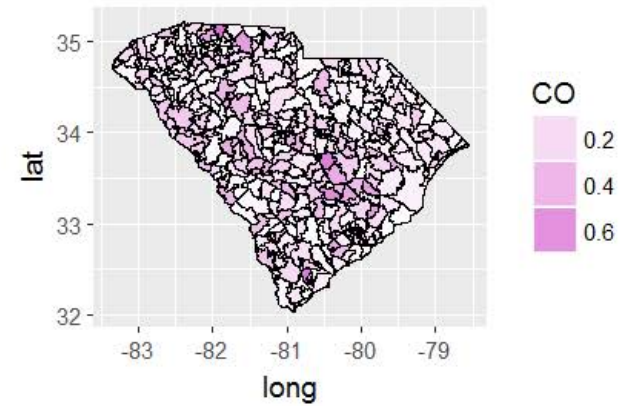

## Y Estimates - CO

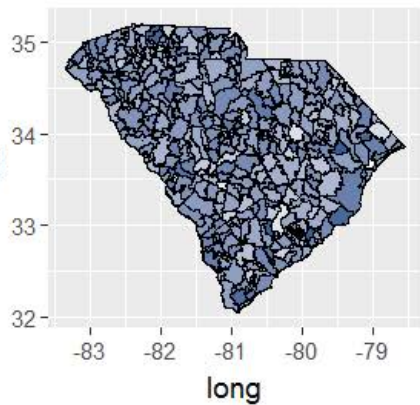

## Y Estimate Errors - CO

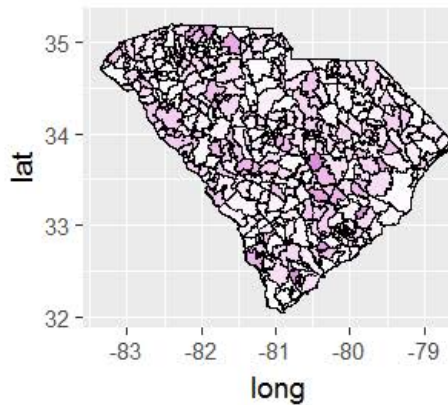



# W and Y estimates and errors - 2 day - Nitrogen Dioxide

## True Values - NO2

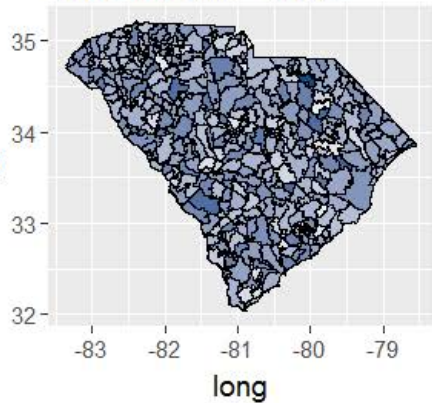

## W Estimates - NO2

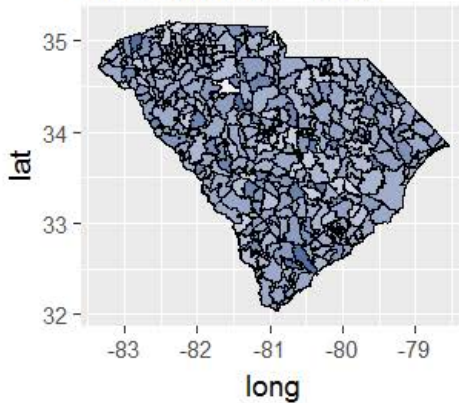

## W Estimate Errors - NO2

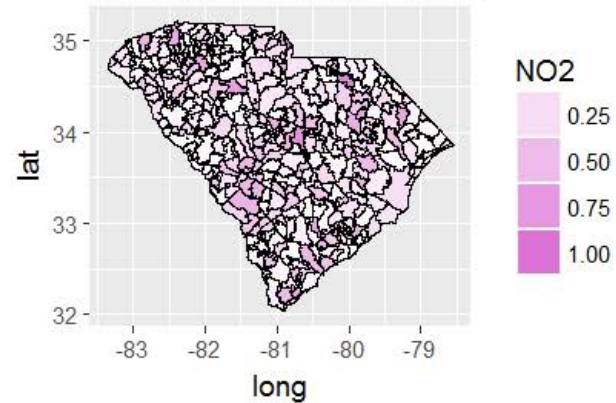

## Y Estimates - NO2

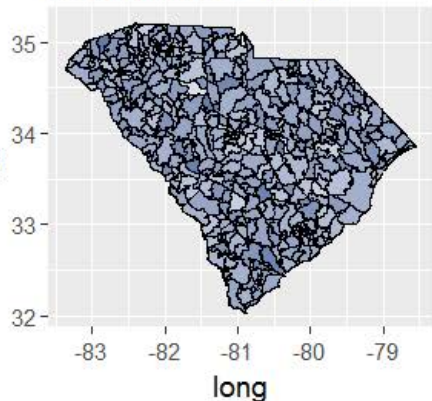

## Y Estimate Errors - NO2

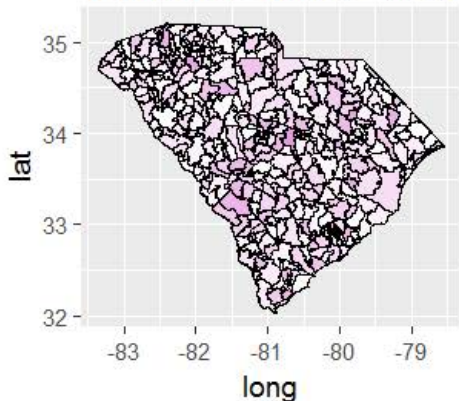

## True Values - NO2

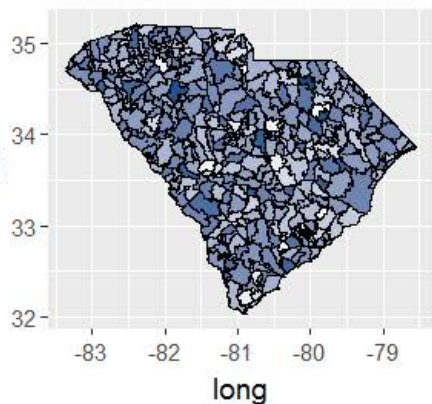

## W Estimates - NO2

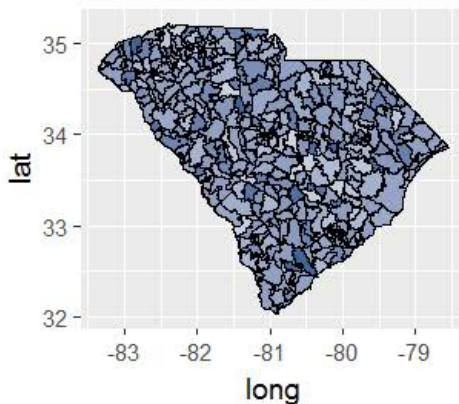

## W Estimate Errors - NO2

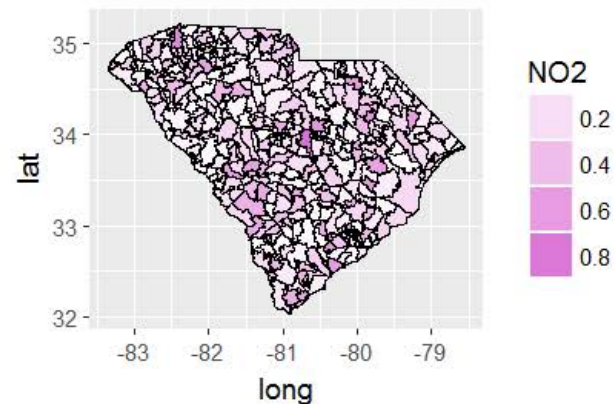

## Y Estimates - NO2

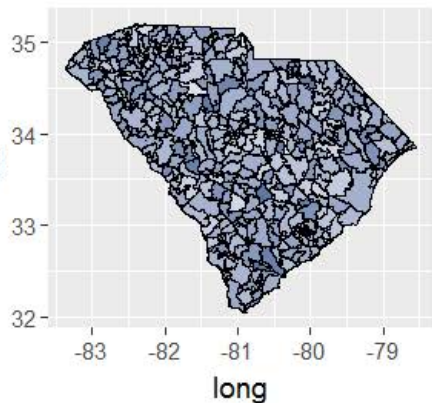

## Y Estimate Errors - NO2

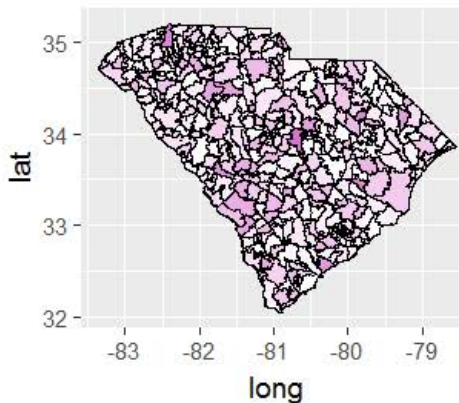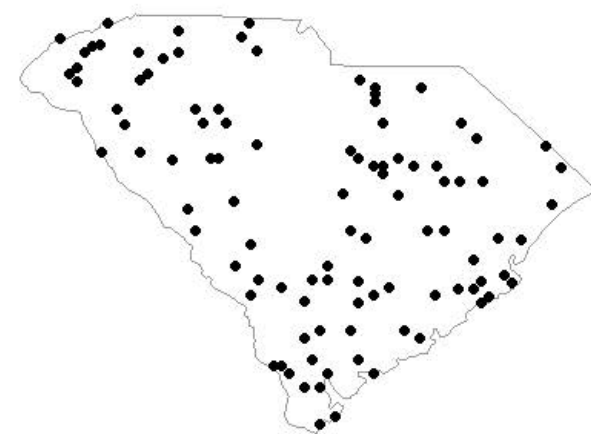



# W and Y estimates and errors - 2 day - Ozone

## True Values - O3

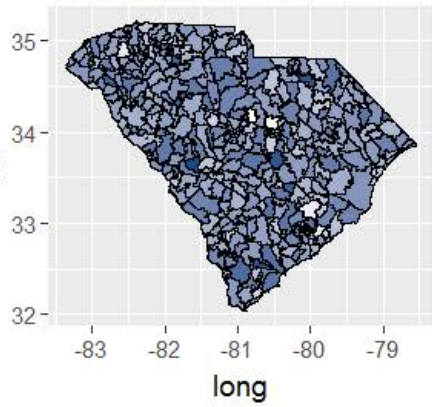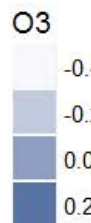

## W Estimates - O3

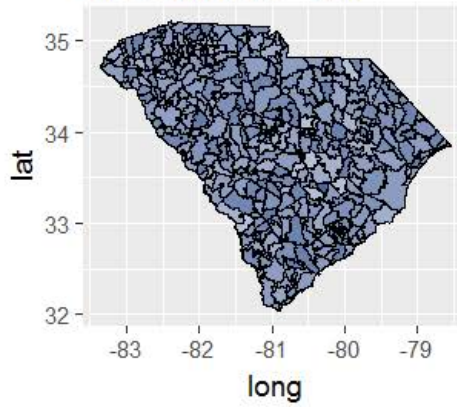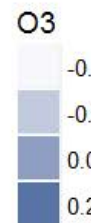

## W Estimate Errors - O3

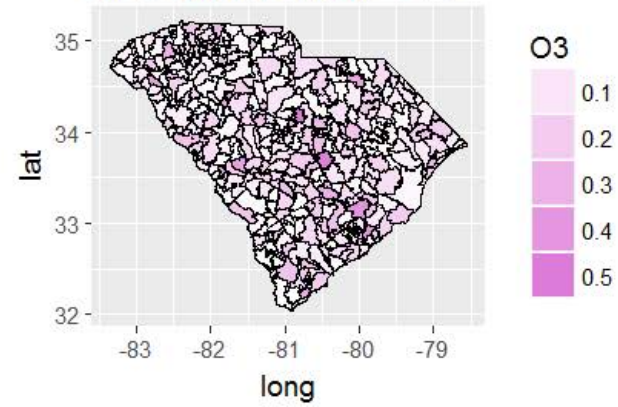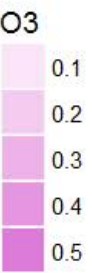

## Y Estimates - O3

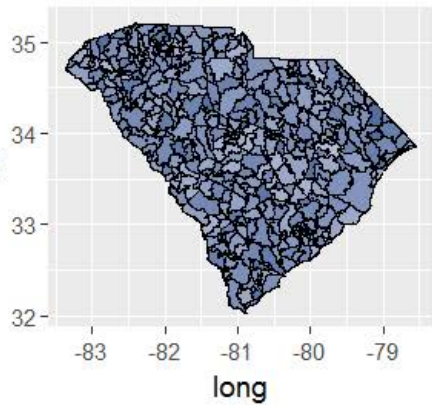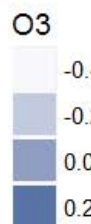

## Y Estimate Errors - O3

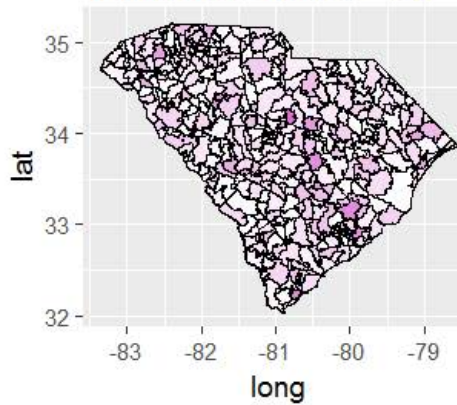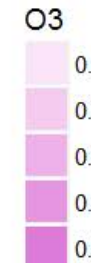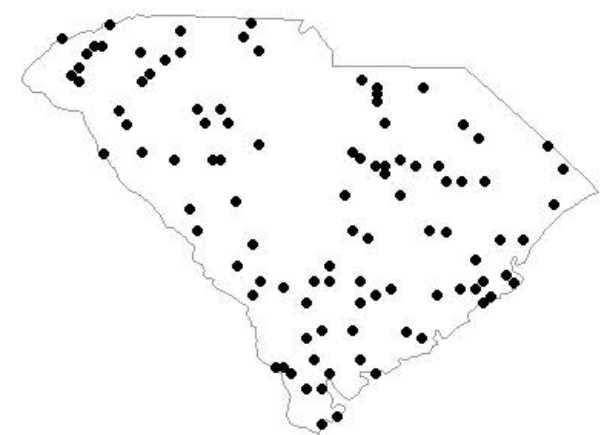

## True Values - O3

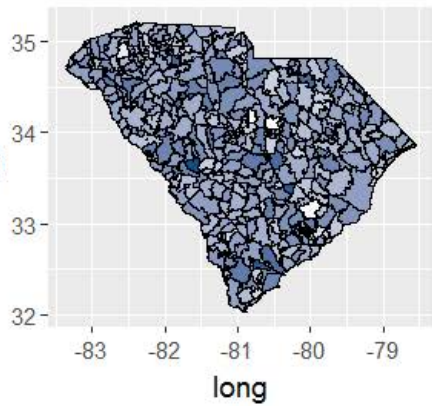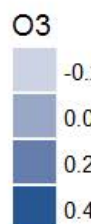

## W Estimates - O3

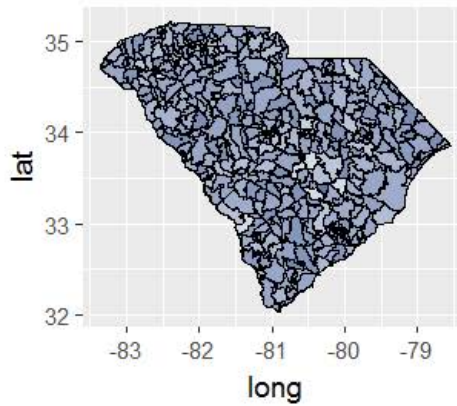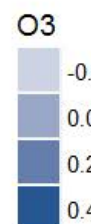

## W Estimate Errors - O3

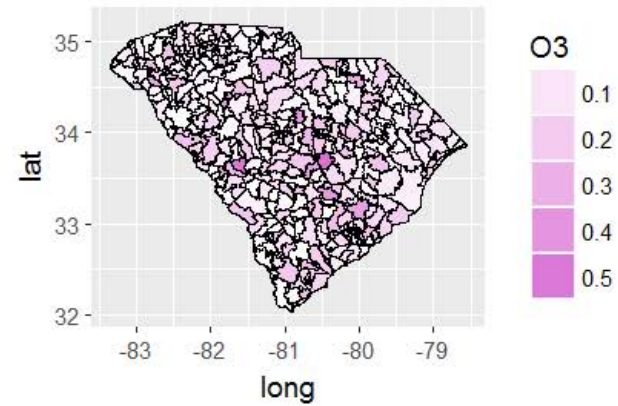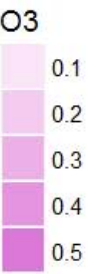

## Y Estimates - O3

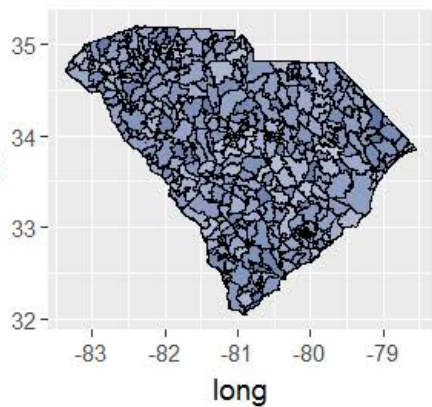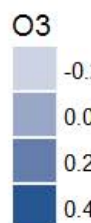

## Y Estimate Errors - O3

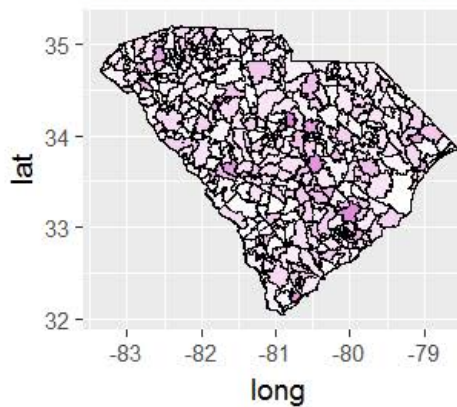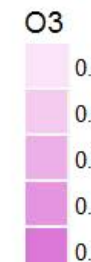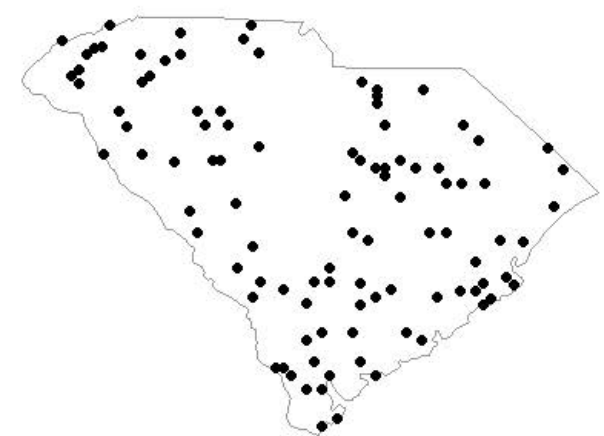



W and Y estimates and errors - 2 day - PM2.5 Sulfate

True Values - SO4

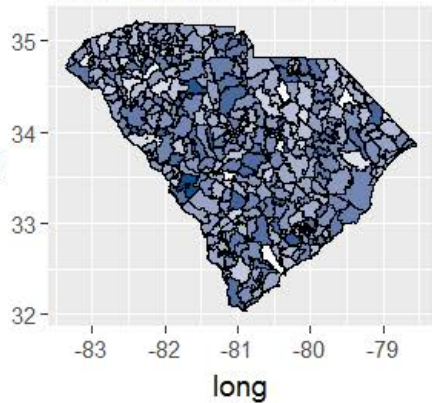

W Estimates - SO4

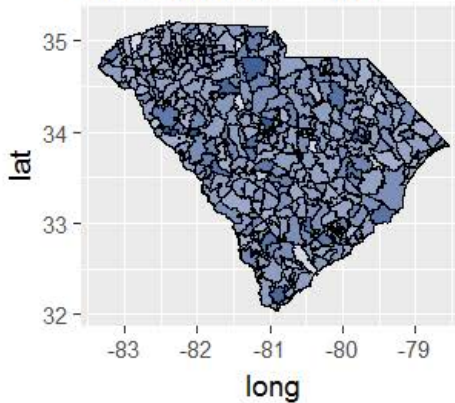

W Estimate Errors - SO4

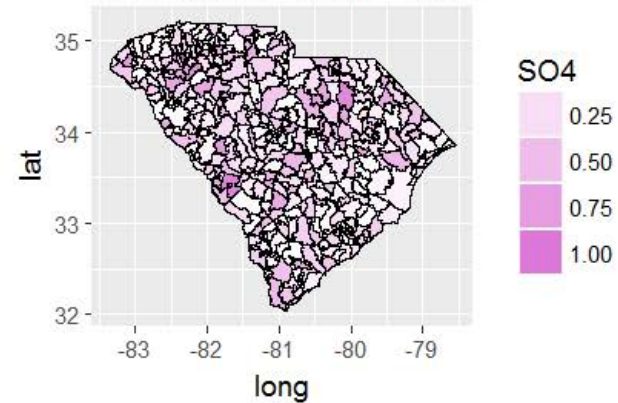

Y Estimates - SO4

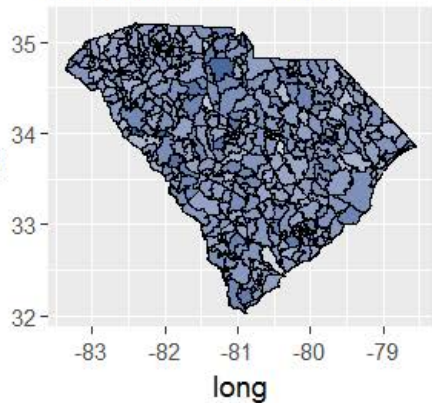

Y Estimate Errors - SO4

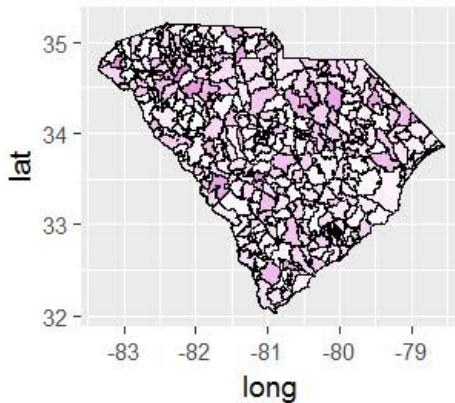

True Values - SO4

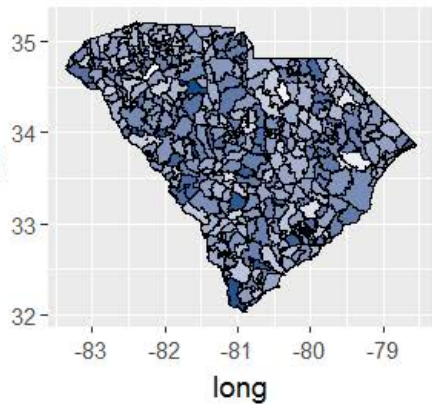

W Estimates - SO4

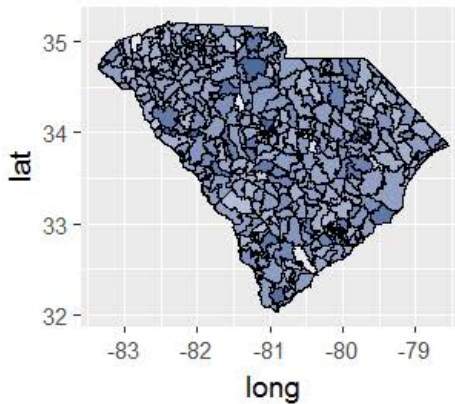

W Estimate Errors - SO4

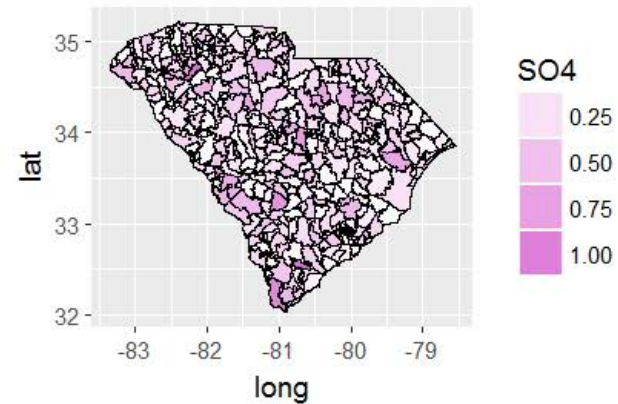

Y Estimates - SO4

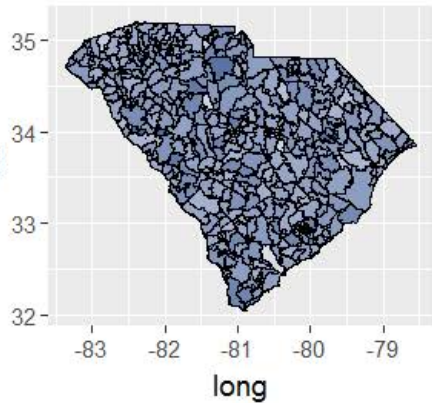

Y Estimate Errors - SO4

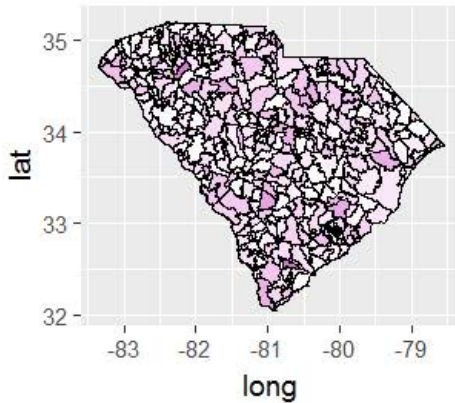



# W and Y estimates and errors - 2 day - Sulfur Dioxide

## True Values - SO2

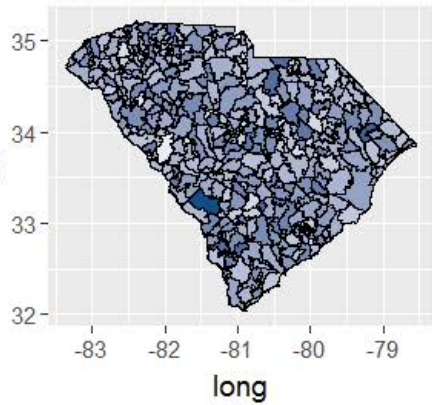

## W Estimates - SO2

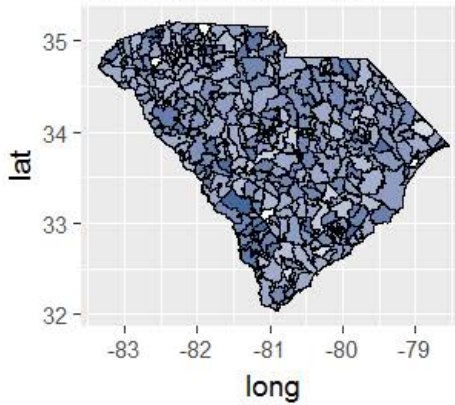

## W Estimate Errors - SO2

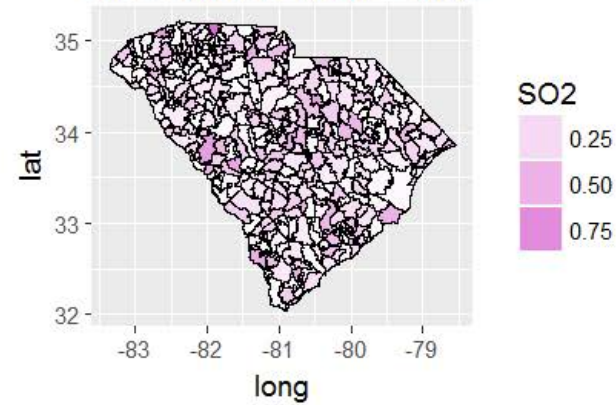

## Y Estimates - SO2

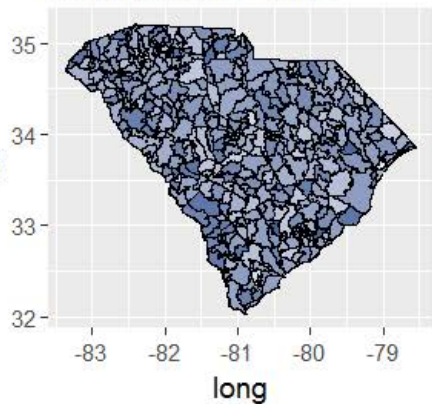

## Y Estimate Errors - SO2

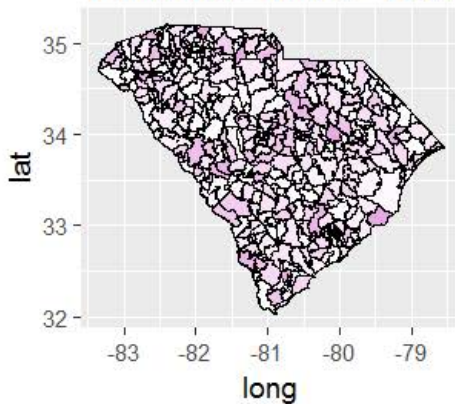

## True Values - SO2

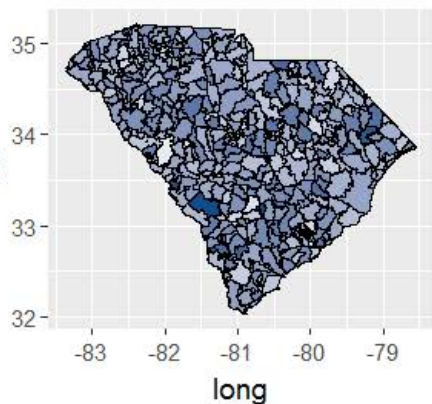

## W Estimates - SO2

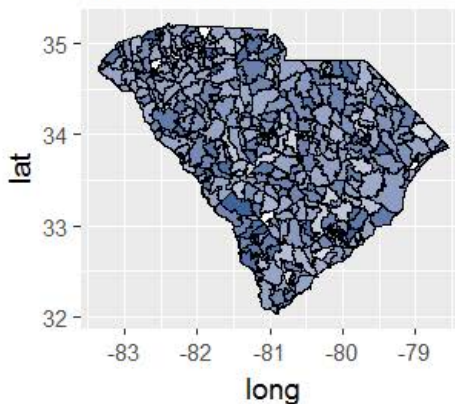

## W Estimate Errors - SO2

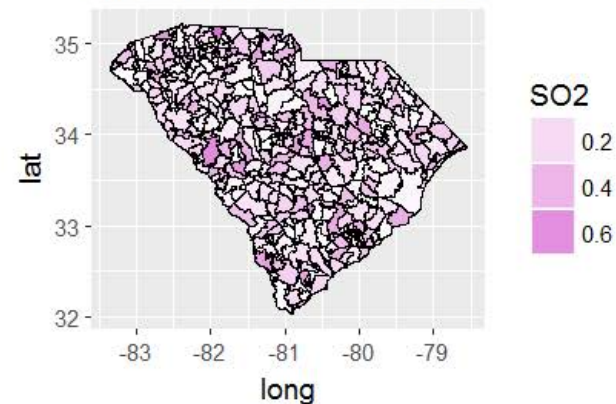

## Y Estimates - SO2

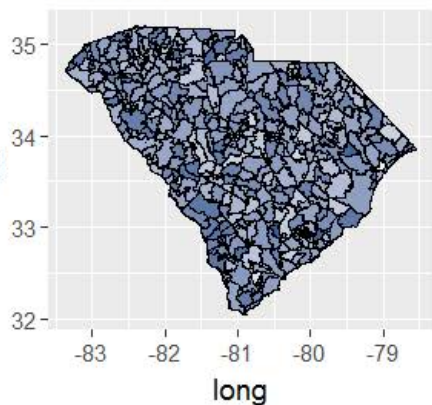

## Y Estimate Errors - SO2

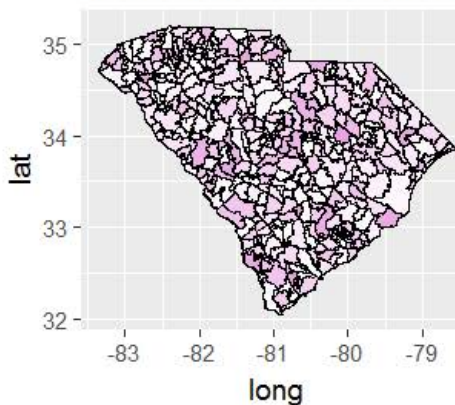



# W and Y estimates and errors - 2 day - Carbon Monoxide

## True Values - CO

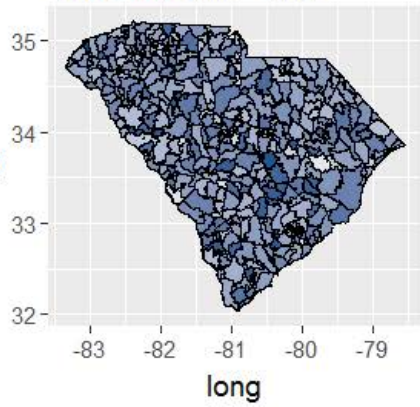

## W Estimates - CO

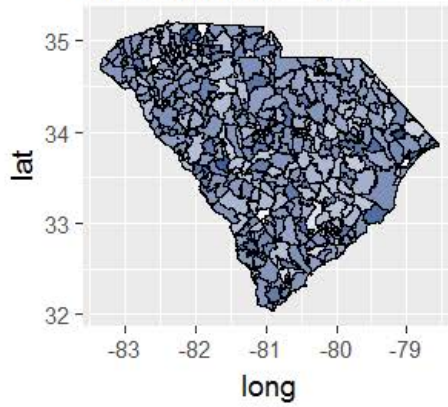

## W Estimate Errors - CO

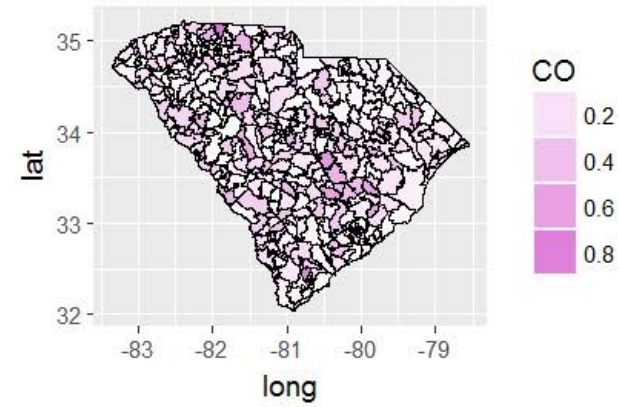

## Y Estimates - CO

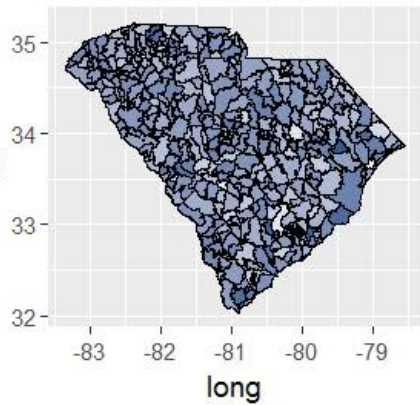

## Y Estimate Errors - CO

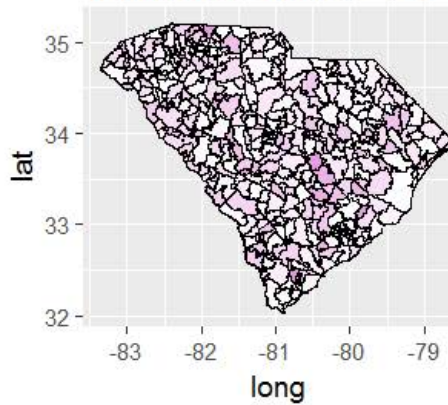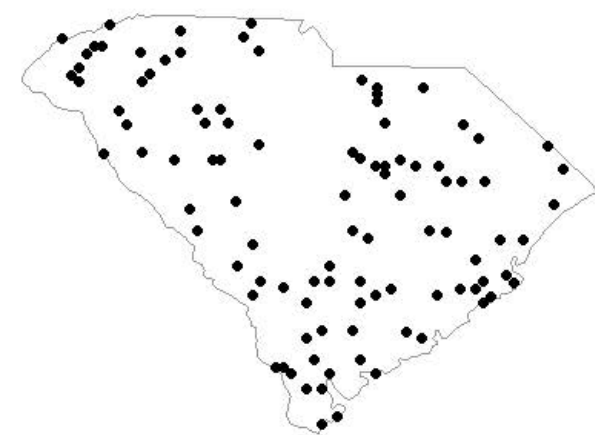

## True Values - CO

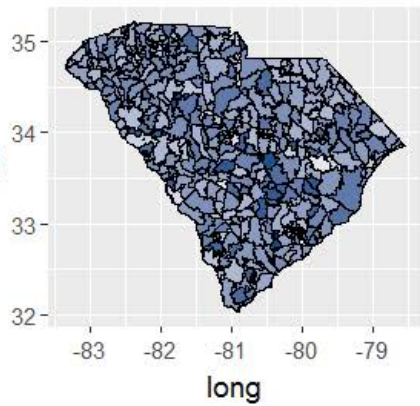

## W Estimates - CO

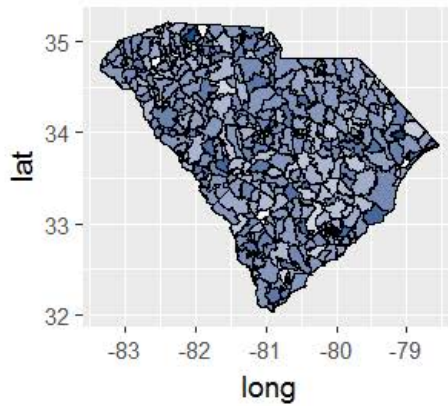

## W Estimate Errors - CO

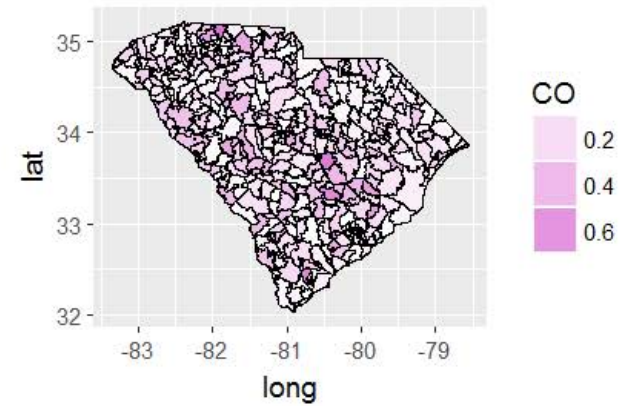

## Y Estimates - CO

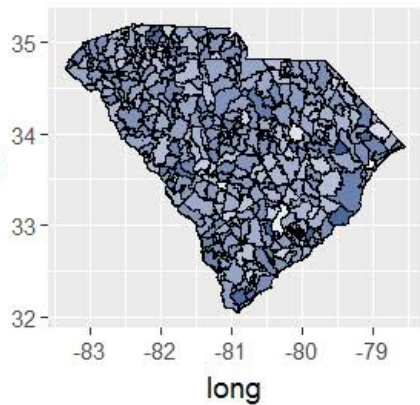

## Y Estimate Errors - CO

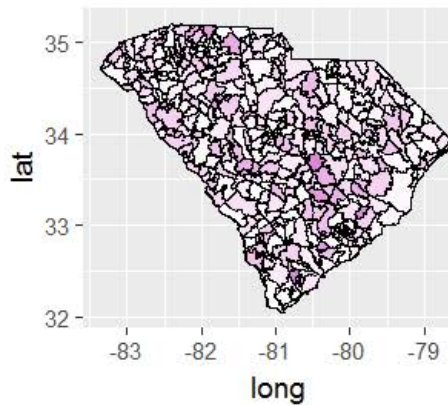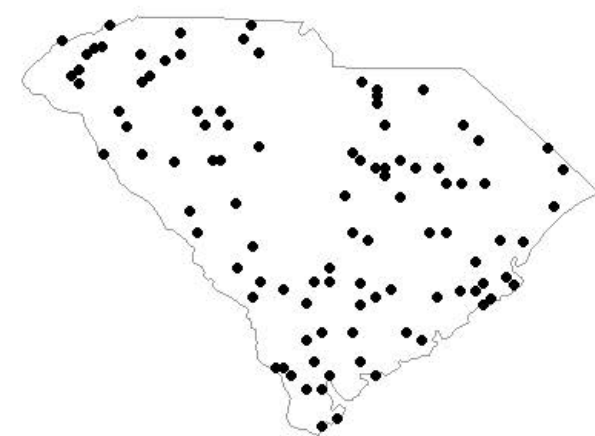



# W and Y estimates and errors - 2 day - Nitrogen Dioxide

## True Values - NO2

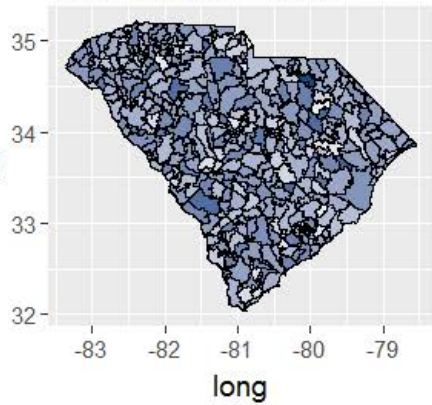

## W Estimates - NO2

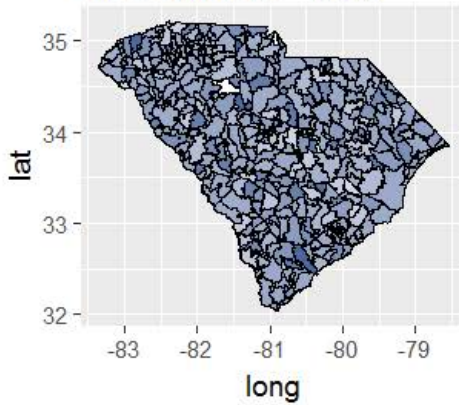

## W Estimate Errors - NO2

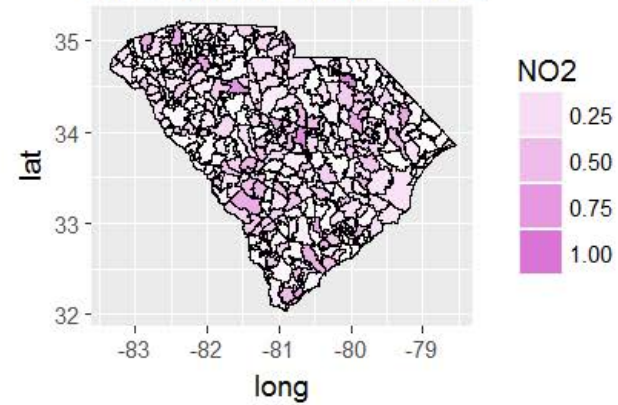

## Y Estimates - NO2

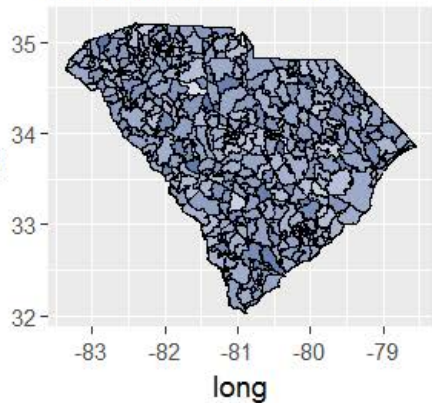

## Y Estimate Errors - NO2

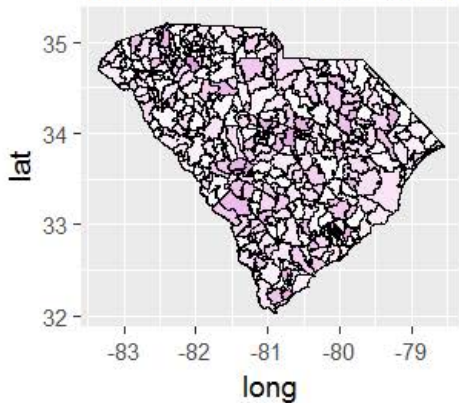

## True Values - NO2

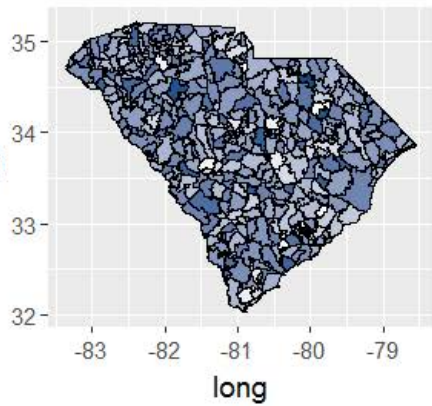

## W Estimates - NO2

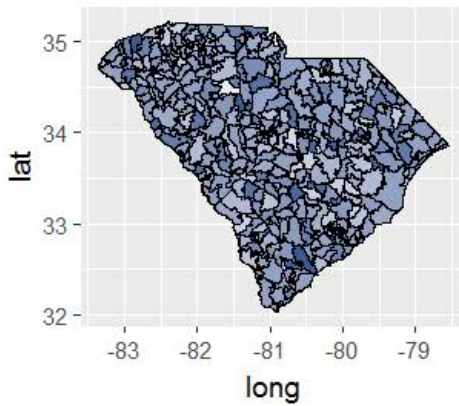

## W Estimate Errors - NO2

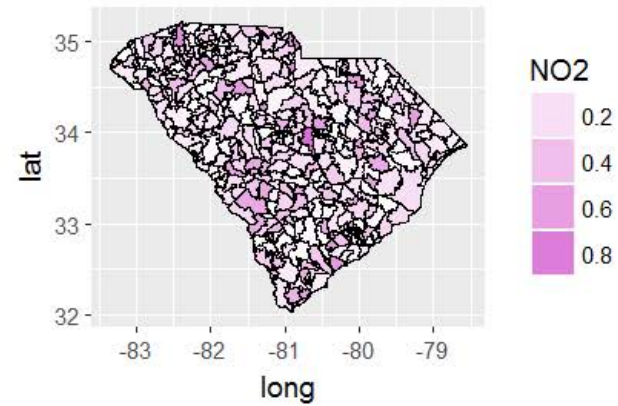

## Y Estimates - NO2

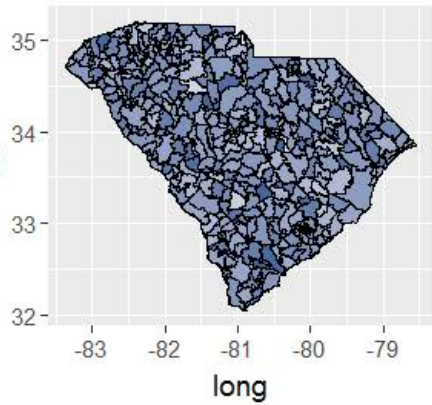

## Y Estimate Errors - NO2

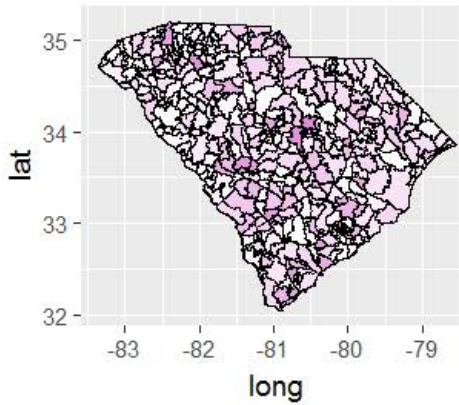



# W and Y estimates and errors - 2 day - Ozone

## True Values - O3

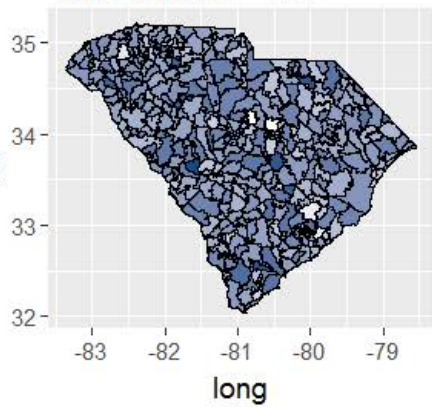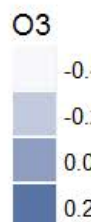

## W Estimates - O3

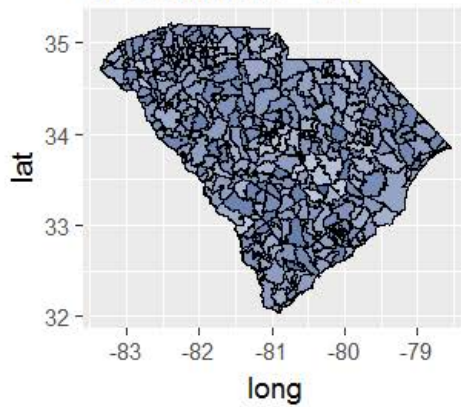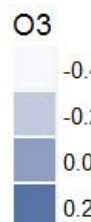

## W Estimate Errors - O3

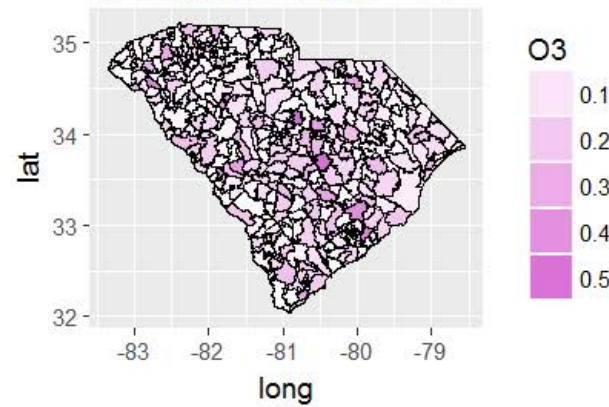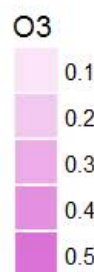

## Y Estimates - O3

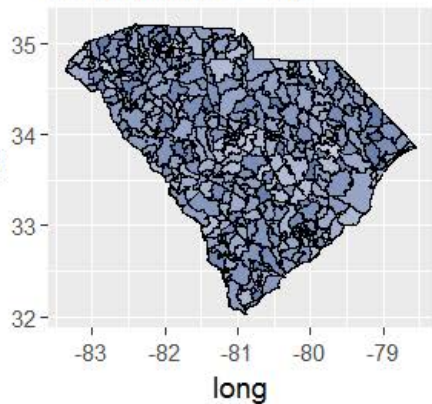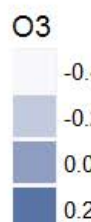

## Y Estimate Errors - O3

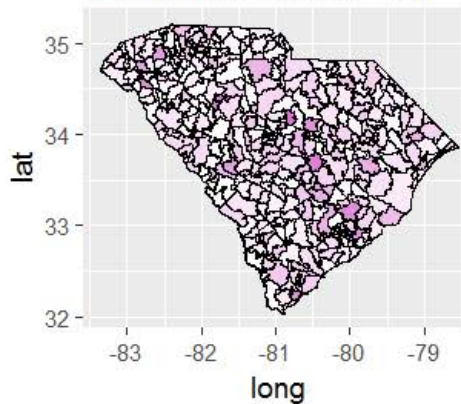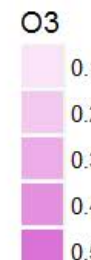

## True Values - O3

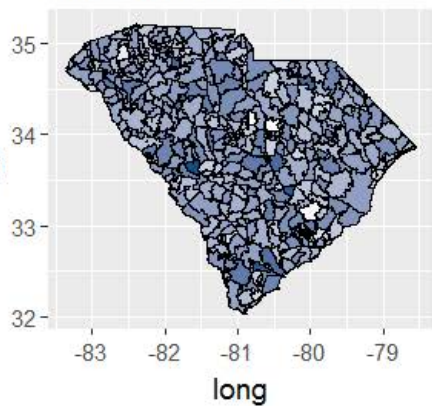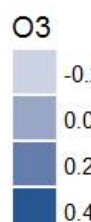

## W Estimates - O3

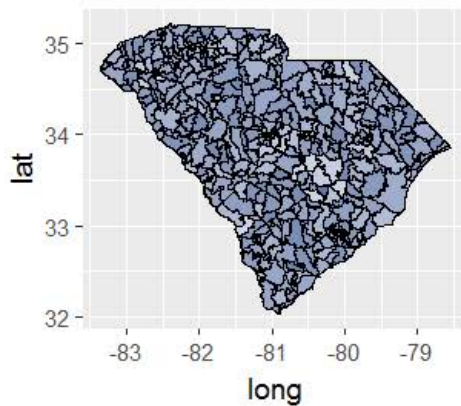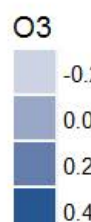

## W Estimate Errors - O3

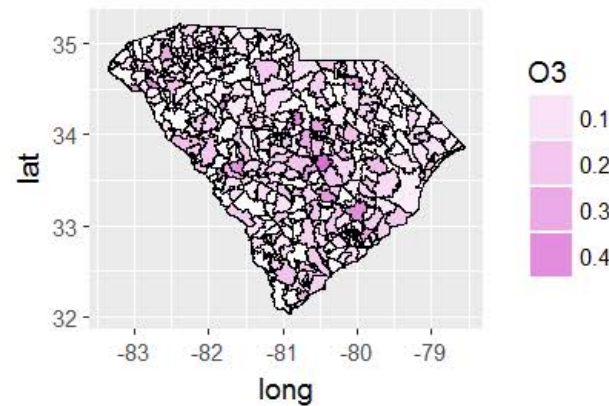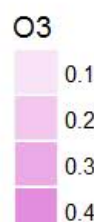

## Y Estimates - O3

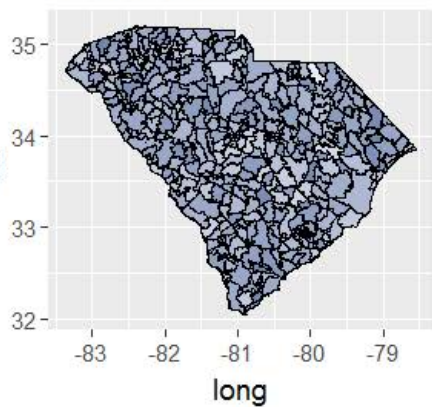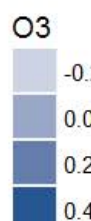

## Y Estimate Errors - O3

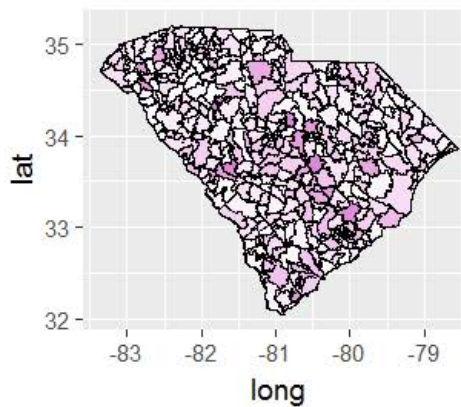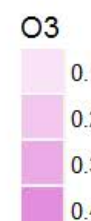



# W and Y estimates and errors - 2 day - PM2.5 Ammonium Ion

## True Values - NH4

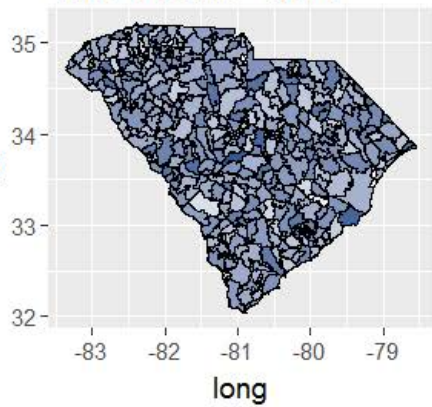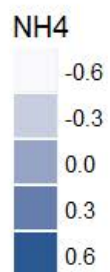

## W Estimates - NH4

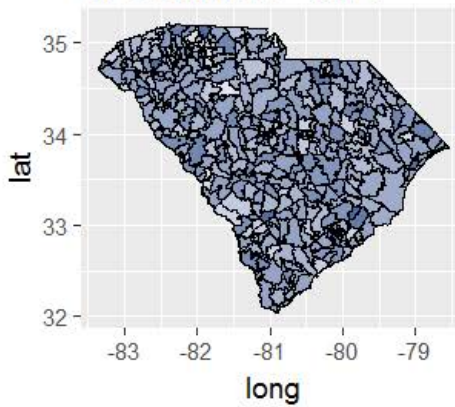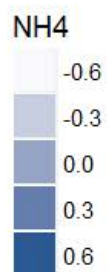

## W Estimate Errors - NH4

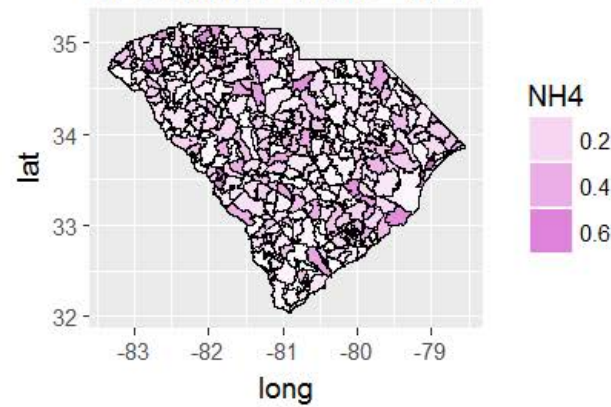

## Y Estimates - NH4

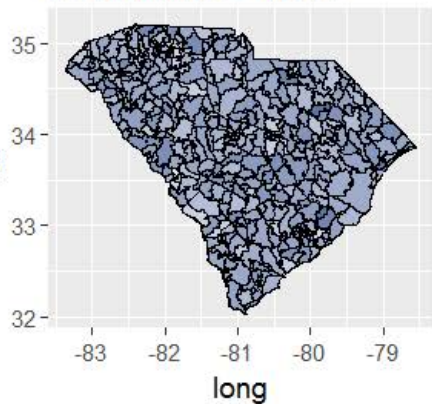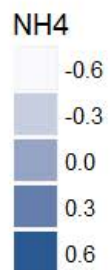

## Y Estimate Errors - NH4

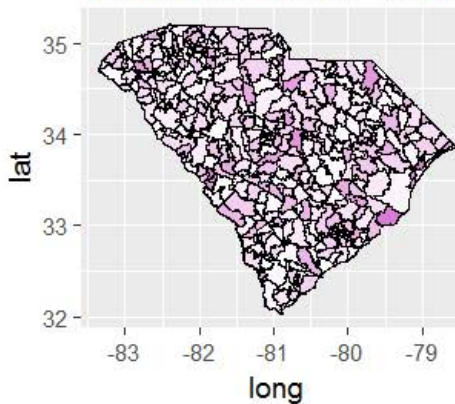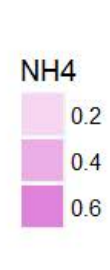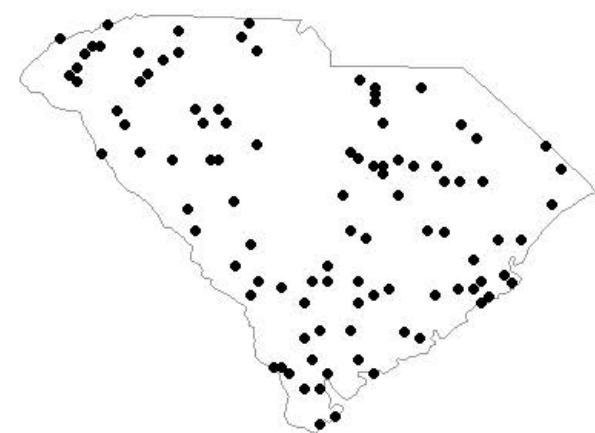

## True Values - NH4

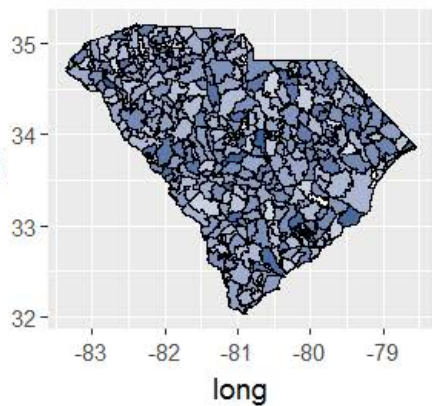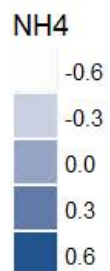

## W Estimates - NH4

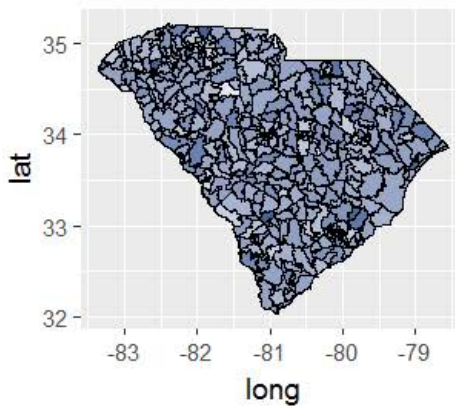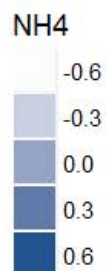

## W Estimate Errors - NH4

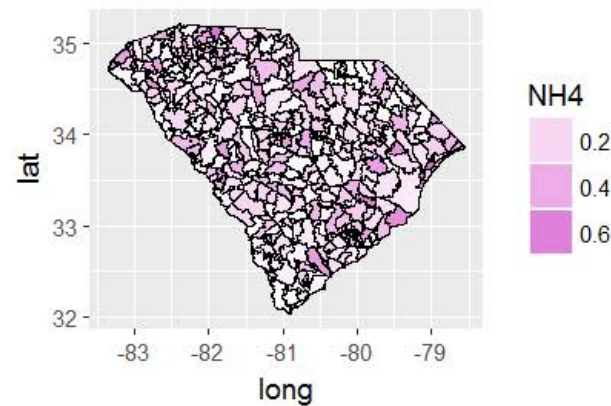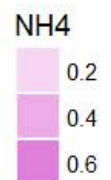

## Y Estimates - NH4

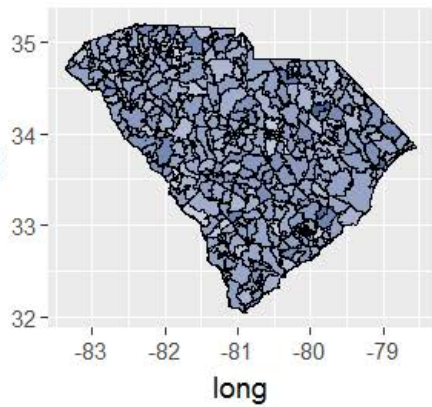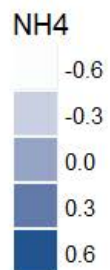

## Y Estimate Errors - NH4

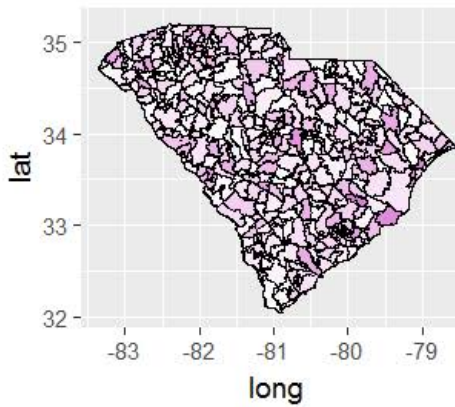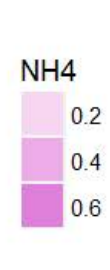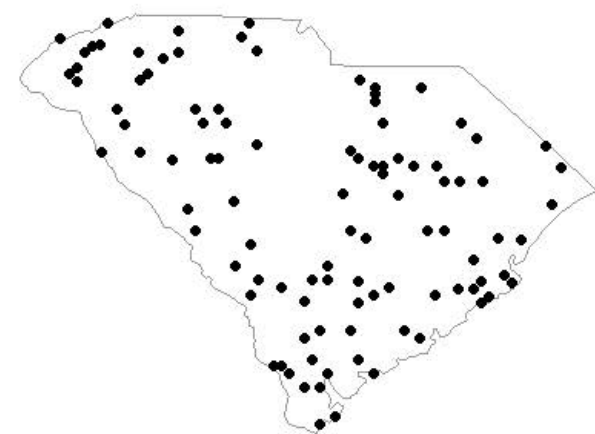



# W and Y estimates and errors - 2 day - PM2.5 EC

## True Values - EC1

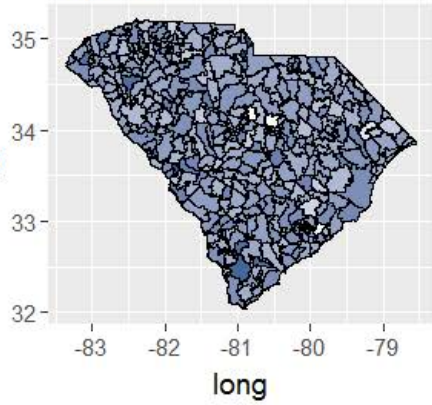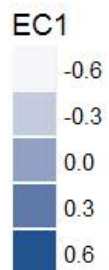

## W Estimates - EC1

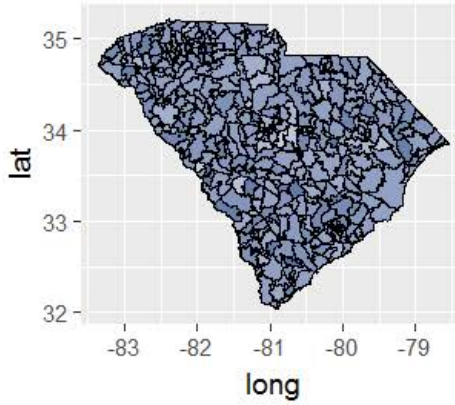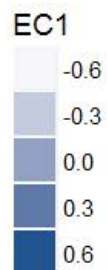

## W Estimate Errors - EC1

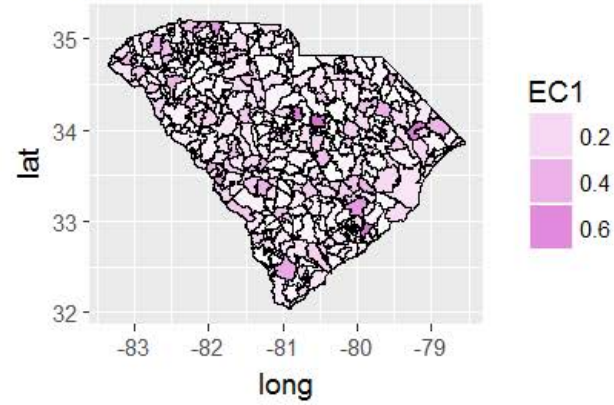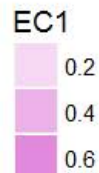

## Y Estimates - EC1

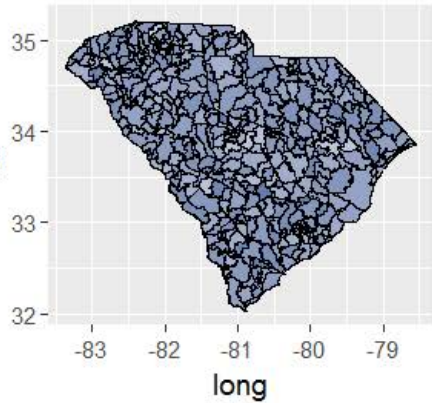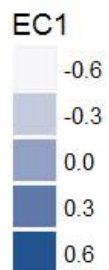

## Y Estimate Errors - EC1

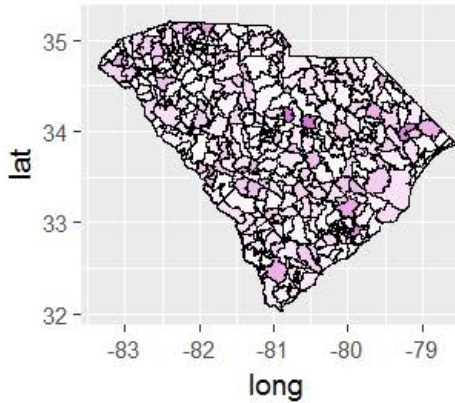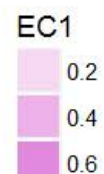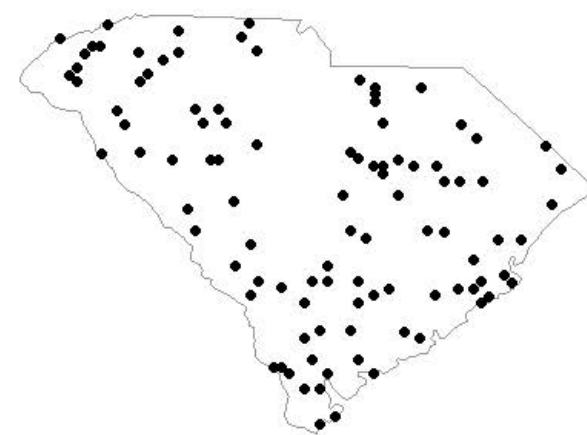

## True Values - EC1

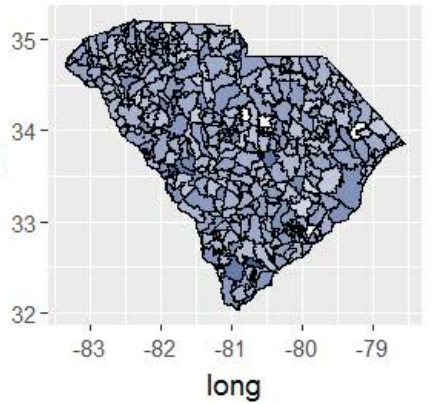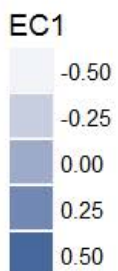

## W Estimates - EC1

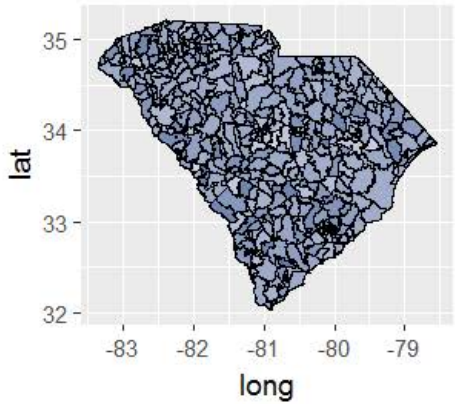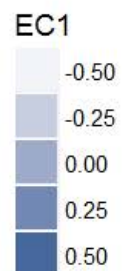

## W Estimate Errors - EC1

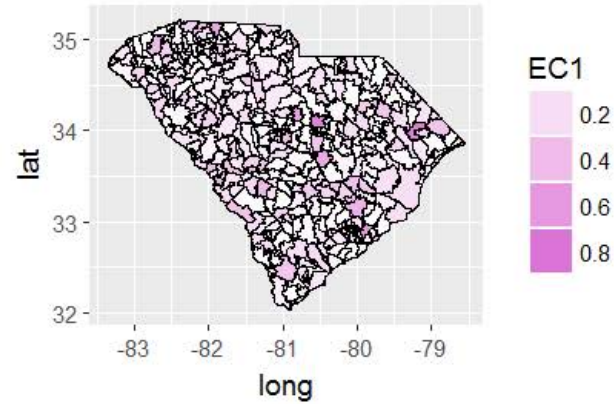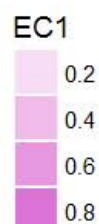

## Y Estimates - EC1

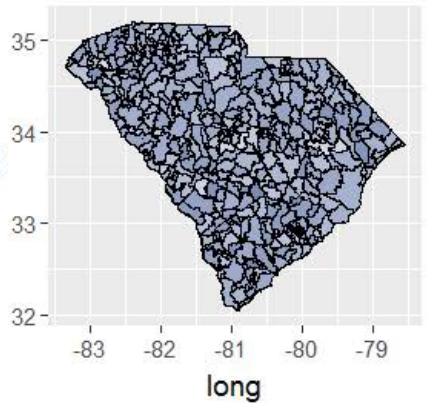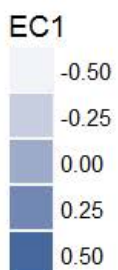

## Y Estimate Errors - EC1

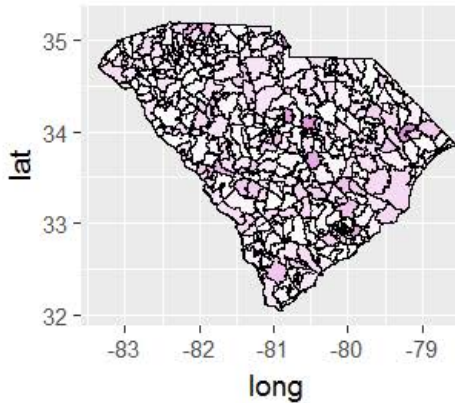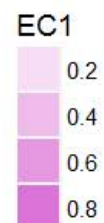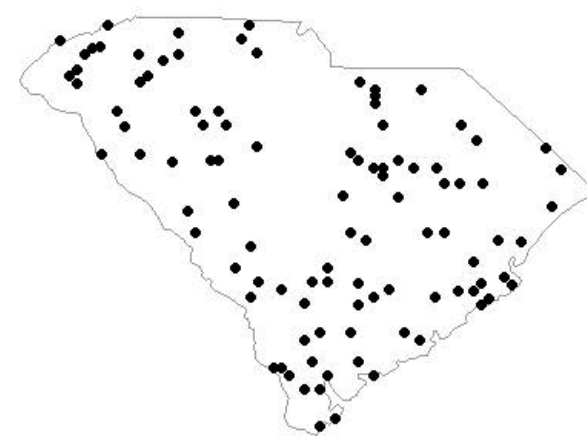

Supplement: NIHMS1032592-supplement-Supp_figS1-14.pdf [file NIHMS1032592-supplement-Supp_figS1-14.pdf]
